# Supplementary material
Source: Research Square preprint supplement (doi:10.21203/rs.3.rs-9290362/v1)
Supplement: Supplementary file 1 [file 49e1e71b3820dd5532750a8e.xlsx]

## Sheet: List of tables
Table S1 - Genes included in screening panels
Table S2 - List of diagnosed probands
Table S3 - ACMG P/LP variants identified
Table S4 - ACMG P/LP variants found in stage 2
Table S5 - VUS variants found across stages
Table S6 - Pathogenic variants found across stages

## Sheet: Table S1
Table S1 - Genes included in screening panels
GeneSymbol	EnsemblGeneID	EnsemblMANEtranscript	NCBI_MANEtranscript	EnsemblMANEprotein	NCBI_MANEprotein	CHR	Start(GRCh38)	End(GRCh38)	AlternateSymbol	PanelApp/MDSinheritanceModel	OMIMinheritanceModel	OMIMgene	PDpanelStatus	AO_NDpanelStatus	AO_movementPanelStatus	MDSpanelStatus	#Panels	GEL-Solved	Stage1-solved	Stage2-solved	All-solved
ABCD1	ENSG00000101986.14	ENST00000218104.6	NM_000033.4	ENSP00000218104.3	NP_000024.2	chrX	153724855	153744755		X-LINKED		300371		Green			1	0	0	0	0
ACTB	ENSG00000075624.19	ENST00000646664.1	NM_001101.5	ENSP00000494750.1	NP_001092.1	chr7	5527147	5530601		MONOALLELIC		102630			Green		1	0	0	0	0
ADCY5	ENSG00000173175.18	ENST00000462833.6	NM_183357.3	ENSP00000419361.1	NP_899200.1	chr3	123282295	123449090			Both	600293				Chorea	1	0	0	0	0
AFG3L2	ENSG00000141385.14	ENST00000269143.8	NM_006796.3	ENSP00000269143.2	NP_006787.2	chr18	12328943	12377227		BOTH		604581		Green	Green		2	0	0	0	0
ALS2	ENSG00000003393.18	ENST00000264276.11	NM_020919.4	ENSP00000264276.6	NP_065970.2	chr2	201700266	201780933		BIALLELIC		606352		Green			1	0	0	0	0
ANG	ENSG00000214274.12	ENST00000397990.5	NM_001097577.3	ENSP00000381077.4	NP_001091046.1	chr14	20688763	20694183		MONOALLELIC		105850		Green			1	0	0	0	0
ANO10	ENSG00000160746.15	ENST00000292246.8	NM_018075.5	ENSP00000292246.3	NP_060545.3	chr3	43365847	43622011			Biallelic	613726				Paroxysmal movement disorder	1	0	0	0	0
ANO3	ENSG00000134343.15	ENST00000256737.8	NM_031418.4	ENSP00000256737.3	NP_113606.2	chr11	26332129	26663289		MONOALLELIC		610110			Green	Dystonia	2	0	0	0	0
ANXA11	ENSG00000122359.20	ENST00000422982.8	NM_145868.2	ENSP00000404412.2	NP_665875.1	chr10	80150888	80205537		MONOALLELIC		602572		Green			1	0	0	0	0
AOPEP	ENSG00000148120.21	ENST00000375315.8	NM_001193329.3	ENSP00000364464.2	NP_001180258.1	chr9	94726698	95087159	C9orf3		Biallelic	619600				Dystonia	1	0	0	0	0
AP5Z1	ENSG00000242802.11	ENST00000649063.2	NM_014855.3	ENSP00000497815.1	NP_055670.1	chr7	4775622	4794397		BIALLELIC		613653		Amber			1	0	0	0	0
APP	ENSG00000142192.24	ENST00000346798.8	NM_000484.4	ENSP00000284981.4	NP_000475.1	chr21	25880549	26170770		MONOALLELIC		104760		Green			1	0	0	0	0
APTX	ENSG00000137074.22	ENST00000379817.7	NM_001195248.2	ENSP00000369145.2	NP_001182177.2	chr9	32972615	33001628		BIALLELIC		606350			Green		1	0	0	0	0
ARHGEF28	ENSG00000214944.12	ENST00000513042.7	NM_001177693.2	ENSP00000441436.1	NP_001171164.1	chr5	73626195	73941990		BOTH		612790		Amber			1	0	0	0	0
ARSA	ENSG00000100299.20	ENST00000216124.10	NM_000487.6	ENSP00000216124.5	NP_000478.3	chr22	50622753	50628152		MONOALLELIC (PD), BIALLELIC (ND)		607574	Amber	Green	Green		3	0	4	0	4
ARX	ENSG00000004848.9	ENST00000379044.5	NM_139058.3	ENSP00000368332.4	NP_620689.1	chrX	25003693	25015965		X-LINKED		300382			Amber		1	0	0	0	0
ATL1	ENSG00000198513.17	ENST00000358385.12	NM_015915.5	ENSP00000351155.7	NP_056999.2	chr14	50560144	50633045			Monoallelic	606439				HSP	1	0	0	0	0
ATM	ENSG00000149311.24	ENST00000675843.1	NM_000051.4	ENSP00000501606.1	NP_000042.3	chr11	108223066	108369102		BIALLELIC		607585			Green		1	0	0	0	0
ATP13A2	ENSG00000159363.20	ENST00000326735.13	NM_022089.4	ENSP00000327214.8	NP_071372.1	chr1	16985957	17011928		BIALLELIC		610513	Green	Green	Green	Parkinsonism	4	0	0	0	0
ATP1A2	ENSG00000018625.17	ENST00000361216.8	NM_000702.4	ENSP00000354490.3	NP_000693.1	chr1	160115758	160143591		MONOALLELIC		182340			Green		1	0	0	0	0
ATP1A3	ENSG00000105409.21	ENST00000648268.1	NM_152296.5	ENSP00000498113.1	NP_689509.1	chr19	41966581	41994230		MONOALLELIC		182350	Green	Green	Green	Dystonia/Parkinsonism	4	0	0	0	0
ATP2B3	ENSG00000067842.21	ENST00000263519.5	NM_001001344.3	ENSP00000263519.4	NP_001001344.1	chrX	153517641	153582929		X-LINKED		300014		Amber			1	0	0	0	0
ATP6AP2	ENSG00000182220.17	ENST00000636580.2	NM_005765.3	ENSP00000490083.1	NP_005756.2	chrX	40580969	40606848		X-LINKED		300556		Amber			1	0	0	0	0
ATP7B	ENSG00000123191.20	ENST00000242839.10	NM_000053.4	ENSP00000242839.5	NP_000044.2	chr13	51932668	52011450		BIALLELIC		606882		Green	Green		2	0	0	0	0
AUH	ENSG00000148090.14	ENST00000375731.9	NM_001698.3	ENSP00000364883.5	NP_001689.1	chr9	91213822	91361918		BIALLELIC		600529		Green	Amber		2	0	0	0	0
C19orf12	ENSG00000131943.22	ENST00000323670.14	NM_031448.6	ENSP00000313332.9	NP_113636.2	chr19	29698936	29715261		BOTH		614297	Green	Green	Green		3	0	0	0	0
CACNA1A	ENSG00000141837.24	ENST00000638009.2	NM_001127221.2	ENSP00000489913.1	NP_001120693.1	chr19	13206441	13506479		MONOALLELIC		601011			Green	Paroxysmal movement disorder	2	0	0	0	0
CACNA1G	ENSG00000006283.18	ENST00000359106.10	NM_018896.5	ENSP00000352011.5	NP_061496.2	chr17	50560714	50627474		MONOALLELIC		604065		Green			1	0	0	0	0
CCDC88C	ENSG00000015133.21	ENST00000389857.11	NM_001080414.4	ENSP00000374507.6	NP_001073883.2	chr14	91271322	91417820		MONOALLELIC		611204		Amber			1	0	0	0	0
CCNF	ENSG00000162063.15	ENST00000397066.9	NM_001761.3	ENSP00000380256.4	NP_001752.2	chr16	2429446	2458854		MONOALLELIC		600227		Green			1	0	0	0	0
CHCHD10	ENSG00000250479.11	ENST00000484558.3	NM_213720.3	ENSP00000418428.3	NP_998885.1	chr22	23765833	23767972		MONOALLELIC		615903		Green			1	0	0	0	0
CHCHD2	ENSG00000106153.16	ENST00000395422.4	NM_016139.4	ENSP00000378812.3	NP_057223.1	chr7	56101572	56106476		MONOALLELIC		616244	Amber	Green	Amber		3	0	0	0	0
CHMP2B	ENSG00000083937.11	ENST00000263780.9	NM_014043.4	ENSP00000263780.4	NP_054762.2	chr3	87227308	87255556		MONOALLELIC		609512		Green	Green		2	0	0	0	0
CIZ1	ENSG00000148337.24	ENST00000372938.10	NM_001131016.2	ENSP00000362029.5	NP_001124488.1	chr9	128166064	128191572		Unknown	Monoallelic	611420		Amber	Amber		2	0	0	0	0
CLCN2	ENSG00000114859.18	ENST00000265593.9	NM_004366.6	ENSP00000265593.4	NP_004357.3	chr3	184346184	184361605		BIALLELIC		600570		Green			1	0	0	0	0
CLN6	ENSG00000128973.15	ENST00000249806.11	NM_017882.3	ENSP00000249806.5	NP_060352.1	chr15	68206991	68229728		BIALLELIC		606725		Green			1	0	0	0	0
COASY	ENSG00000068120.15	ENST00000393818.3	NM_025233.7	ENSP00000377406.1	NP_079509.5	chr17	42562147	42566277		BIALLELIC		609855	Amber	Green			2	0	0	0	0
COL4A1	ENSG00000187498.19	ENST00000375820.10	NM_001845.6	ENSP00000364979.4	NP_001836.3	chr13	110148962	110307157		MONOALLELIC		120130		Green			1	0	0	0	0
COL4A2	ENSG00000134871.22	ENST00000360467.7	NM_001846.4	ENSP00000353654.5	NP_001837.2	chr13	110307283	110513209		MONOALLELIC		120090		Green			1	0	0	0	0
COQ2	ENSG00000173085.16	ENST00000647002.2	NM_001358921.2	ENSP00000495761.2	NP_001345850.1	chr4	83263823	83284798		BIALLELIC		609825		Amber			1	0	0	0	0
CP	ENSG00000047457.16	ENST00000264613.11	NM_000096.4	ENSP00000264613.6	NP_000087.2	chr3	149172496	149221829		BIALLELIC		117700		Green	Green	Dystonia/Parkinsonism	3	0	0	0	0
CSF1R	ENSG00000182578.16	ENST00000675795.1	NM_001288705.3	ENSP00000501699.1	NP_001275634.1	chr5	150053294	150086554		MONOALLELIC		164770	Green	Green	Green		3	0	1	0	1
CST3	ENSG00000101439.11	ENST00000376925.8	NM_000099.4	ENSP00000366124.3	NP_000090.1	chr20	23633656	23637955		MONOALLELIC		604312		Amber			1	0	0	0	0
CTSA	ENSG00000064601.23	ENST00000646241.3	NM_000308.4	ENSP00000493613.2	NP_000299.3	chr20	45891334	45898820		MONOALLELIC		613111		Green			1	0	0	0	0
CTSF	ENSG00000174080.14	ENST00000310325.10	NM_003793.4	ENSP00000310832.5	NP_003784.2	chr11	66563463	66568606		BIALLELIC		603539		Green			1	0	0	0	0
CYP27A1	ENSG00000135929.11	ENST00000258415.9	NM_000784.4	ENSP00000258415.4	NP_000775.1	chr2	218782146	218815293		BIALLELIC		606530		Green	Green		2	0	0	0	0
CYP7B1	ENSG00000172817.6	ENST00000310193.4	NM_004820.5	ENSP00000310721.3	NP_004811.1	chr8	64590850	64798737		BIALLELIC		603711		Green			1	0	0	0	0
DARS2	ENSG00000117593.14	ENST00000649689.2	NM_018122.5	ENSP00000497569.1	NP_060592.2	chr1	173824672	173858546		BIALLELIC		610956		Green			1	0	0	0	0
DCAF17	ENSG00000115827.16	ENST00000375255.8	NM_025000.4	ENSP00000364404.3	NP_079276.2	chr2	171434225	171485052		BIALLELIC		612515			Green		1	0	0	0	0
DCTN1	ENSG00000204843.15	ENST00000628224.3	NM_004082.5	ENSP00000487279.2	NP_004073.2	chr2	74361154	74380311		MONOALLELIC		601143	Green	Green	Green	Parkinsonism	4	1	0	0	1
DDC	ENSG00000132437.20	ENST00000444124.7	NM_001082971.2	ENSP00000403644.2	NP_001076440.2	chr7	50458441	50565405		BIALLELIC		107930			Amber		1	0	0	0	0
DNAJB2	ENSG00000135924.19	ENST00000336576.10	NM_006736.6	ENSP00000338019.5	NP_006727.2	chr2	219279365	219286895		BIALLELIC		604139		Green			1	0	0	0	0
DNAJC13	ENSG00000138246.18	ENST00000260818.11	NM_015268.4	ENSP00000260818.6	NP_056083.3	chr3	132417501	132539032		MONOALLELIC		614334		Amber			1	0	0	0	0
DNAJC5	ENSG00000101152.14	ENST00000360864.9	NM_025219.3	ENSP00000354111.4	NP_079495.1	chr20	63895125	63936011		MONOALLELIC		611203		Green			1	0	0	0	0
DNAJC6	ENSG00000116675.16	ENST00000371069.5	NM_001256864.2	ENSP00000360108.4	NP_001243793.1	chr1	65309542	65415871		BIALLELIC		608375	Green	Green	Green	Parkinsonism	4	0	0	0	0
DNAJC7	ENSG00000168259.19	ENST00000457167.9	NM_003315.4	ENSP00000406463.2	NP_003306.3	chr17	41976434	42017439		MONOALLELIC		601964		Green			1	0	0	0	0
DNMT1	ENSG00000130816.19	ENST00000359526.9	NM_001130823.3	ENSP00000352516.3	NP_001124295.1	chr19	10133345	10194953		MONOALLELIC		126375		Green			1	0	0	0	0
EIF2AK2	ENSG00000055332.21	ENST00000233057.9	NM_001135651.3	ENSP00000233057.4	NP_001129123.1	chr2	37099209	37156980			Both	176871				Dystonia	1	0	0	0	0
EIF2B1	ENSG00000111361.15	ENST00000424014.7	NM_001414.4	ENSP00000416250.2	NP_001405.1	chr12	123620405	123633686		BIALLELIC		606686		Green			1	0	0	0	0
EIF2B2	ENSG00000119718.13	ENST00000266126.10	NM_014239.4	ENSP00000266126.5	NP_055054.1	chr14	75002920	75012366		BIALLELIC		606454		Green			1	0	0	0	0
EIF2B3	ENSG00000070785.19	ENST00000360403.7	NM_020365.5	ENSP00000353575.2	NP_065098.1	chr1	44850521	44986595		BIALLELIC		606273		Green			1	0	0	0	0
EIF2B4	ENSG00000115211.19	ENST00000347454.9	NM_001034116.2	ENSP00000233552.6	NP_001029288.1	chr2	27364351	27370338		BIALLELIC		606687		Green			1	0	0	0	0
EIF2B5	ENSG00000145191.17	ENST00000648915.2	NM_003907.3	ENSP00000497160.1	NP_003898.2	chr3	184135357	184145311		BIALLELIC		603945		Green			1	0	0	0	0
EIF4G1	ENSG00000114867.24	ENST00000346169.7	NM_198241.3	ENSP00000316879.5	NP_937884.2	chr3	184314605	184335353		MONOALLELIC		600495		Amber	Amber		2	0	0	0	0
ELOVL4	ENSG00000118402.7	ENST00000369816.5	NM_022726.4	ENSP00000358831.4	NP_073563.1	chr6	79914813	79947553		MONOALLELIC		605512		Green			1	0	0	0	0
EPM2A	ENSG00000112425.17	ENST00000367519.9	NM_005670.4	ENSP00000356489.3	NP_005661.1	chr6	145625304	145735520		BIALLELIC		607566		Green			1	0	0	0	0
ERBB4	ENSG00000178568.17	ENST00000342788.9	NM_005235.3	ENSP00000342235.4	NP_005226.1	chr2	211375716	212538802		MONOALLELIC		600543		Green			1	0	0	0	0
EWSR1	ENSG00000182944.20	ENST00000397938.7	NM_005243.4	ENSP00000381031.2	NP_005234.1	chr22	29268267	29300521		MONOALLELIC		133450		Amber			1	0	0	0	0
FBXO7	ENSG00000100225.20	ENST00000266087.12	NM_012179.4	ENSP00000266087.7	NP_036311.3	chr22	32474810	32498829		BIALLELIC		605648	Green	Green	Green	Parkinsonism	4	0	0	0	0
FOXG1	ENSG00000176165.14	ENST00000313071.7	NM_005249.5	ENSP00000339004.3	NP_005240.3	chr14	28766786	28770277			Monoallelic	164874			Amber		1	0	0	0	0
FTL	ENSG00000087086.18	ENST00000331825.11	NM_000146.4	ENSP00000366525.2	NP_000137.2	chr19	48965308	48966879		MONOALLELIC		134790	Green	Green	Green		3	0	0	0	0
FUS	ENSG00000089280.22	ENST00000254108.12	NM_004960.4	ENSP00000254108.8	NP_004951.1	chr16	31180138	31191605		MONOALLELIC		137070		Green			1	0	0	0	0
GBA1	ENSG00000177628.18	ENST00000368373.8	NM_000157.4	ENSP00000357357.3	NP_000148.2	chr1	155234451	155241249	GBA	BOTH(PD), BIALLELIC(ND)		606463	Green	Green	Green	Parkinsonism	4	5	1	0	6
GBE1	ENSG00000114480.15	ENST00000429644.7	NM_000158.4	ENSP00000410833.2	NP_000149.4	chr3	81489702	81761645		BIALLELIC		607839		Green			1	0	0	0	0
GCDH	ENSG00000105607.16	ENST00000222214.10	NM_000159.4	ENSP00000222214.4	NP_000150.1	chr19	12891159	12899999		BIALLELIC		608801		Amber			1	0	0	0	0
GCH1	ENSG00000131979.22	ENST00000491895.7	NM_000161.3	ENSP00000419045.2	NP_000152.1	chr14	54842016	54902826		BOTH		600225	Green	Green	Green	Dystonia/Parkinsonism	4	0	0	0	0
GFAP	ENSG00000131095.16	ENST00000588735.3	NM_002055.5	ENSP00000466598.2	NP_002046.1	chr17	44903158	44915500		MONOALLELIC		137780		Green	Green		2	0	0	0	0
GIGYF2	ENSG00000204120.18	ENST00000373563.9	NM_001103146.3	ENSP00000362664.5	NP_001096616.1	chr2	232697330	232860605		MONOALLELIC		612003		Amber			1	0	0	0	0
GLA	ENSG00000102393.16	ENST00000218516.4	NM_000169.3	ENSP00000218516.4	NP_000160.1	chrX	101397802	101407925		X-LINKED		300644		Green			1	0	0	0	0
GLB1	ENSG00000170266.17	ENST00000307363.10	NM_000404.4	ENSP00000306920.4	NP_000395.3	chr3	32996616	33097146		BIALLELIC		611458			Amber	Dystonia/Parkinsonism	2	0	0	0	0
GLT8D1	ENSG00000016864.21	ENST00000266014.11	NM_018446.4	ENSP00000266014.5	NP_060916.1	chr3	52694485	52705791		MONOALLELIC		618399		Amber			1	0	0	0	0
GNAL	ENSG00000141404.18	ENST00000334049.11	NM_182978.4	ENSP00000334051.5	NP_892023.1	chr18	11689263	11885685		MONOALLELIC		139312			Green	Dystonia	2	0	0	0	0
GRN	ENSG00000030582.21	ENST00000053867.8	NM_002087.4	ENSP00000053867.2	NP_002078.1	chr17	44345301	44353106		MONOALLELIC(PD), BOTH(ND)		138945	Green	Green	Green		3	0	0	0	0
GSN	ENSG00000148180.24	ENST00000432226.7	NM_198252.3	ENSP00000404226.2	NP_937895.1	chr9	121268161	121332842		MONOALLELIC		137350		Green			1	0	0	0	0
GTPBP2	ENSG00000172432.21	ENST00000307126.10	NM_019096.5	ENSP00000303997.5	NP_061969.3	chr6	43620493	43629264		BIALLELIC		607434			Green		1	0	0	0	0
HEXA	ENSG00000213614.13	ENST00000268097.10	NM_000520.6	ENSP00000268097.6	NP_000511.2	chr15	72340923	72376014		BIALLELIC		606869		Green			1	0	0	0	0
HEXB	ENSG00000049860.15	ENST00000261416.12	NM_000521.4	ENSP00000261416.7	NP_000512.2	chr5	74685232	74721288		BIALLELIC		606873		Green			1	0	0	0	0
HNRNPA1	ENSG00000135486.21	ENST00000340913.11	NM_031157.4	ENSP00000341826.7	NP_112420.1	chr12	54280725	54287087		MONOALLELIC		164017		Green			1	0	0	0	0
HNRNPA2B1	ENSG00000122566.25	ENST00000618183.5	NM_002137.4	ENSP00000478691.2	NP_002128.1	chr7	26189926	26200746		MONOALLELIC		600124		Amber			1	0	0	0	0
HPCA	ENSG00000121905.12	ENST00000373467.4	NM_002143.3	ENSP00000362566.3	NP_002134.2	chr1	32886490	32894646		BIALLELIC		142622			Green	Dystonia	2	0	0	0	0
HTRA1	ENSG00000166033.15	ENST00000368984.8	NM_002775.5	ENSP00000357980.3	NP_002766.1	chr10	122461552	122514907		BOTH		602194		Green			1	0	0	0	0
ITM2B	ENSG00000136156.17	ENST00000647800.2	NM_021999.5	ENSP00000497221.1	NP_068839.1	chr13	48233205	48270357		MONOALLELIC		603904		Green			1	0	0	0	0
JAM2	ENSG00000154721.17	ENST00000480456.6	NM_021219.4	ENSP00000420419.1	NP_067042.1	chr21	25639257	25717562	PGFRB		Biallelic	606870				Brain calcification associated movement disorder	1	0	0	0	0
KCNA1	ENSG00000111262.6	ENST00000382545.5	NM_000217.3	ENSP00000371985.3	NP_000208.2	chr12	4909904	4918256			Monoallelic	176260				Paroxysmal movement disorder	1	0	0	0	0
KCNC3	ENSG00000131398.15	ENST00000477616.2	NM_004977.3	ENSP00000434241.1	NP_004968.2	chr19	50311936	50329377		MONOALLELIC		176264		Green			1	0	0	0	0
KCND3	ENSG00000171385.13	ENST00000302127.5	NM_001378969.1	ENSP00000306923.4	NP_001365898.1	chr1	111770661	111989668		MONOALLELIC		605411		Green			1	0	0	0	0
KCTD17	ENSG00000100379.20	ENST00000403888.8	NM_001282684.2	ENSP00000385096.4	NP_001269613.2	chr22	37051741	37063390			Monoallelic	616386				Dystonia	1	0	0	0	0
KIF5A	ENSG00000155980.15	ENST00000455537.7	NM_004984.4	ENSP00000408979.2	NP_004975.2	chr12	57550043	57586633		MONOALLELIC		602821		Green			1	1	0	0	1
KMT2B	ENSG00000272333.9	ENST00000420124.4	NM_014727.3	ENSP00000398837.2	NP_055542.1	chr19	35718002	35738878		MONOALLELIC		606834			Green	Dystonia	2	0	0	0	0
LAMB1	ENSG00000091136.17	ENST00000222399.11	NM_002291.3	ENSP00000222399.6	NP_002282.2	chr7	107923798	108003161		BIALLELIC		150240		Green			1	0	0	0	0
LRRK2	ENSG00000188906.19	ENST00000298910.12	NM_198578.4	ENSP00000298910.7	NP_940980.4	chr12	40224996	40369285		MONOALLELIC		609007	Green	Green	Green	Parkinsonism	4	6	8	0	14
LYST	ENSG00000143669.17	ENST00000389793.7	NM_000081.4	ENSP00000374443.2	NP_000072.2	chr1	235661040	235866906		BIALLELIC		606897	Green	Green	Green		3	0	0	0	0
MAPT	ENSG00000186868.20	ENST00000262410.10	NM_001377265.1	ENSP00000262410.6	NP_001364194.1	chr17	45894553	46028334		MONOALLELIC		157140	Green	Green	Green		3	1	0	0	1
MARS2	ENSG00000247626.5	ENST00000282276.8	NM_138395.4	ENSP00000282276.6	NP_612404.1	chr2	197705368	197708395		BIALLELIC		609728		Amber			1	0	0	0	0
MATR3	ENSG00000015479.22	ENST00000394805.8	NM_018834.6	ENSP00000378284.3	NP_061322.2	chr5	139293739	139331677		MONOALLELIC		164015		Amber			1	0	0	0	0
MYORG	ENSG00000164976.11	ENST00000297625.8	NM_020702.5	ENSP00000297625.8	NP_065753.2	chr9	34366665	34376898	KIAA1161	BIALLELIC		618255		Green	Green	Brain calcification associated movement disorder	3	0	0	0	0
NAA60	ENSG00000122390.21	ENST00000407558.9	NM_001083601.3	ENSP00000385903.4	NP_001077070.1	chr16	3443679	3486953		BIALLELIC		614246		Green			1	0	0	0	0
NEK1	ENSG00000137601.20	ENST00000507142.6	NM_001199397.3	ENSP00000424757.2	NP_001186326.1	chr4	169392808	169612583		MONOALLELIC		604588		Green			1	0	0	0	0
NHLRC1	ENSG00000187566.6	ENST00000340650.6	NM_198586.3	ENSP00000345464.3	NP_940988.2	chr6	18120439	18122677		BIALLELIC		608072		Green			1	0	0	0	0
NKX2-1	ENSG00000136352.21	ENST00000354822.7	NM_001079668.3	ENSP00000346879.6	NP_001073136.1	chr14	36516396	36520232		MONOALLELIC		600635			Green	Chorea	2	0	0	0	0
NOTCH3	ENSG00000074181.11	ENST00000263388.7	NM_000435.3	ENSP00000263388.1	NP_000426.2	chr19	15159037	15200995		MONOALLELIC		600276		Green			1	0	0	0	0
NPC1	ENSG00000141458.15	ENST00000269228.10	NM_000271.5	ENSP00000269228.4	NP_000262.2	chr18	23531441	23586506		BIALLELIC		607623		Green			1	0	0	0	0
NPC2	ENSG00000119655.13	ENST00000555619.6	NM_006432.5	ENSP00000451112.2	NP_006423.1	chr14	74479939	74493305		BIALLELIC		601015		Green			1	0	0	0	0
NR4A2	ENSG00000153234.18	ENST00000339562.9	NM_006186.4	ENSP00000344479.4	NP_006177.1	chr2	156324436	156332721		BIALLELIC		601828		Amber			1	0	0	0	0
OPA3	ENSG00000125741.7	ENST00000263275.5	NM_025136.4	ENSP00000263275.4	NP_079412.1	chr19	45546280	45584802		BIALLELIC		606580	Green				1	0	0	0	0
OPTN	ENSG00000123240.19	ENST00000378747.8	NM_001008212.2	ENSP00000368021.3	NP_001008213.1	chr10	13100162	13138308		BOTH		602432		Green			1	0	0	0	0
PANK2	ENSG00000125779.25	ENST00000610179.7	NM_001386393.1	ENSP00000477429.2	NP_001373322.1	chr20	3889386	3929887		BIALLELIC		606157	Green	Green	Green		3	0	0	0	0
PARK7	ENSG00000116288.15	ENST00000338639.10	NM_007262.5	ENSP00000340278.5	NP_009193.2	chr1	7961710	7985505		BIALLELIC		602533	Green	Green	Green	Parkinsonism	4	1	0	0	1
PDE10A	ENSG00000112541.19	ENST00000539869.4	NM_001385079.1	ENSP00000438284.3	NP_001372008.1	chr6	165327288	165663241			Biallelic	610652				Chorea	1	0	0	0	0
PDE2A	ENSG00000186642.17	ENST00000334456.10	NM_002599.5	ENSP00000334910.5	NP_002590.1	chr11	72576140	72674422		BIALLELIC		602658			Amber		1	0	0	0	0
PDGFB	ENSG00000100311.19	ENST00000331163.11	NM_002608.4	ENSP00000330382.6	NP_002599.1	chr22	39223358	39244982		MONOALLELIC		190040	Green	Green	Green	Brain calcification associated movement disorder	4	0	0	0	0
PDGFRB	ENSG00000113721.16	ENST00000261799.9	NM_002609.4	ENSP00000261799.4	NP_002600.1	chr5	150113838	150155845		MONOALLELIC		173410		Green	Green	Brain calcification associated movement disorder	3	0	0	0	0
PDHA1	ENSG00000131828.16	ENST00000422285.7	NM_000284.4	ENSP00000394382.2	NP_000275.1	chrX	19343926	19361718		X-LINKED		300502				Paroxysmal movement disorder	1	0	0	0	0
PFN1	ENSG00000108518.10	ENST00000225655.6	NM_005022.4	ENSP00000225655.5	NP_005013.1	chr17	4945651	4948530		MONOALLELIC		176610		Green			1	0	0	0	0
PINK1	ENSG00000158828.10	ENST00000321556.5	NM_032409.3	ENSP00000364204.3	NP_115785.1	chr1	20633457	20651511		BIALLELIC		608309	Green	Green	Green	Parkinsonism	4	2	1	0	3
PLA2G6	ENSG00000184381.22	ENST00000332509.8	NM_003560.4	ENSP00000333142.3	NP_003551.2	chr22	38111494	38181830		BIALLELIC		603604	Green	Green	Green	Dystonia/Parkinsonism	4	1	1	0	2
PLP1	ENSG00000123560.16	ENST00000621218.5	NM_000533.5	ENSP00000484450.1	NP_000524.3	chrX	103776839	103792619		X-LINKED		300401			Amber		1	0	0	0	0
PNKD	ENSG00000127838.17	ENST00000273077.9	NM_015488.5	ENSP00000273077.4	NP_056303.3	chr2	218270518	218346793		MONOALLELIC		609023			Green	Paroxysmal movement disorder	2	0	0	0	0
POLG	ENSG00000140521.19	ENST00000268124.11	NM_002693.3	ENSP00000268124.5	NP_002684.1	chr15	89316319	89334824		BOTH		174763		Amber			1	0	0	0	0
PPP2R5D	ENSG00000112640.18	ENST00000485511.6	NM_006245.4	ENSP00000417963.1	NP_006236.1	chr6	42984569	43012342		MONOALLELIC		601646			Green		1	0	0	0	0
PRKN	ENSG00000185345.26	ENST00000366898.6	NM_004562.3	ENSP00000355865.1	NP_004553.2	chr6	161347416	162727766	PARK2	BIALLELIC		602544	Green	Green	Green	Parkinsonism	4	8	9	0	17
PRKRA	ENSG00000180228.16	ENST00000325748.9	NM_003690.5	ENSP00000318176.4	NP_003681.1	chr2	178431413	178451175		BIALLELIC		603424	Green	Amber	Green	Dystonia	4	0	0	0	0
PRNP	ENSG00000171867.20	ENST00000379440.9	NM_000311.5	ENSP00000368752.4	NP_000302.1	chr20	4686455	4701588		MONOALLELIC		176640		Green	Green		2	0	0	0	0
PRPH	ENSG00000135406.16	ENST00000257860.9	NM_006262.4	ENSP00000257860.4	NP_006253.2	chr12	49295146	49298686		MONOALLELIC		170710		Amber			1	0	0	0	0
PRRT2	ENSG00000167371.23	ENST00000358758.12	NM_145239.3	ENSP00000351608.7	NP_660282.2	chr16	29812192	29815881		MONOALLELIC		614386			Green	Paroxysmal movement disorder	2	0	0	0	0
PSAP	ENSG00000197746.17	ENST00000394936.8	NM_002778.4	ENSP00000378394.3	NP_002769.1	chr10	71816297	71851251		MONOALLELIC		176801		Green			1	0	0	0	0
PSEN1	ENSG00000080815.22	ENST00000324501.10	NM_000021.4	ENSP00000326366.5	NP_000012.1	chr14	73136506	73223691		MONOALLELIC		104311		Green			1	1	0	0	1
PSEN2	ENSG00000143801.20	ENST00000366783.8	NM_000447.3	ENSP00000355747.3	NP_000438.2	chr1	226870615	226896098		MONOALLELIC		600759		Green			1	0	0	0	0
PTRHD1	ENSG00000184924.8	ENST00000328379.6	NM_001013663.2	ENSP00000330389.4	NP_001013685.1	chr2	24789727	24793391		BIALLELIC		617342	Green				1	0	0	0	0
PTS	ENSG00000150787.10	ENST00000280362.8	NM_000317.3	ENSP00000280362.3	NP_000308.1	chr11	112226427	112233973			Biallelic	612719			Amber	Dystonia/Parkinsonism	2	0	0	0	0
QDPR	ENSG00000151552.15	ENST00000281243.10	NM_000320.3	ENSP00000281243.5	NP_000311.2	chr4	17486394	17512090		BIALLELIC		612676			Amber	Dystonia/Parkinsonism	2	0	0	0	0
RAB32	ENSG00000118508.7	ENST00000367495.4	NM_006834.5	ENSP00000356465.3	NP_006825.1	chr6	146543832	146554953		MONOALLELIC		612906		Green		Parkinsonism	2	0	0	0	0
RAB39B	ENSG00000155961.6	ENST00000369454.4	NM_171998.4	ENSP00000358466.3	NP_741995.1	chrX	155258234	155264491		X-LINKED		300774	Green		Green		2	0	0	0	0
REEP1	ENSG00000068615.22	ENST00000538924.7	NM_001371279.1	ENSP00000438346.3	NP_001358208.1	chr2	86213992	86337626			Both	609139				HSP	1	0	0	0	0
RNF216	ENSG00000011275.20	ENST00000389902.8	NM_207111.4	ENSP00000374552.3	NP_996994.1	chr7	5620046	5781663		BIALLELIC		609948		Green	Green		2	0	0	0	0
SETX	ENSG00000107290.16	ENST00000224140.6	NM_015046.7	ENSP00000224140.5	NP_055861.3	chr9	132261355	132354986		BOTH		608465		Green			1	0	0	0	0
SGCE	ENSG00000127990.21	ENST00000648936.2	NM_003919.3	ENSP00000497130.1	NP_003910.1	chr7	94584979	94656133		MONOALLELIC		604149			Green	Dystonia	2	0	0	0	0
SIGMAR1	ENSG00000147955.20	ENST00000277010.9	NM_005866.4	ENSP00000277010.4	NP_005857.1	chr9	34634721	34637787		BIALLELIC		601978		Amber			1	0	0	0	0
SLC19A3	ENSG00000135917.18	ENST00000644224.2	NM_025243.4	ENSP00000495385.1	NP_079519.1	chr2	227683762	227718028		BIALLELIC		606152			Green		1	0	0	0	0
SLC1A3	ENSG00000079215.17	ENST00000265113.9	NM_004172.5	ENSP00000265113.4	NP_004163.3	chr5	36606605	36688334			Monoallelic	600111				Paroxysmal movement disorder	1	0	0	0	0
SLC20A2	ENSG00000168575.13	ENST00000520262.6	NM_001257180.2	ENSP00000429754.1	NP_001244109.1	chr8	42416474	42501231		MONOALLELIC		158378		Green	Green	Brain calcification associated movement disorder	3	0	0	0	0
SLC2A1	ENSG00000117394.26	ENST00000426263.10	NM_006516.4	ENSP00000416293.2	NP_006507.2	chr1	42925352	42958868		BOTH		138140			Green	Paroxysmal movement disorder	2	0	0	0	0
SLC30A10	ENSG00000196660.14	ENST00000366926.4	NM_018713.3	ENSP00000355893.4	NP_061183.2	chr1	219910444	219928557		BIALLELIC		611146	Green	Amber	Green	Dystonia/Parkinsonism	4	0	0	0	0
SLC39A14	ENSG00000104635.17	ENST00000381237.6	NM_001128431.4	ENSP00000370635.1	NP_001121903.1	chr8	22367277	22422736		BIALLELIC		608736	Green				1	0	0	0	0
SLC6A3	ENSG00000142319.21	ENST00000270349.12	NM_001044.5	ENSP00000270349.9	NP_001035.1	chr5	1392793	1445440		BIALLELIC		126455	Green			Dystonia/Parkinsonism	2	0	0	0	0
SNCA	ENSG00000145335.19	ENST00000394991.8	NM_000345.4	ENSP00000378442.4	NP_000336.1	chr4	89724098	89837161		MONOALLELIC		163890	Green	Green	Green	Parkinsonism	4	1	2	0	3
SNCB	ENSG00000074317.13	ENST00000393693.7	NM_003085.5	ENSP00000377296.2	NP_003076.1	chr5	176620081	176630534			Monoallelic	602569		Amber			1	0	0	0	0
SOD1	ENSG00000142168.17	ENST00000270142.11	NM_000454.5	ENSP00000270142.7	NP_000445.1	chr21	31659692	31668931		BOTH		147450		Green			1	0	0	0	0
SORL1	ENSG00000137642.15	ENST00000260197.12	NM_003105.6	ENSP00000260197.6	NP_003096.2	chr11	121452313	121633763		MONOALLELIC		602005		Amber			1	0	0	0	0
SPAST	ENSG00000021574.17	ENST00000315285.9	NM_014946.4	ENSP00000320885.3	NP_055761.2	chr2	32063555	32157637		MONOALLELIC		604277		Green		HSP	2	1	0	0	1
SPG11	ENSG00000104133.18	ENST00000261866.12	NM_025137.4	ENSP00000261866.7	NP_079413.3	chr15	44562695	44663662		BIALLELIC		610844	Green	Green	Green		3	0	1	0	1
SPG21	ENSG00000090487.13	ENST00000204566.7	NM_016630.7	ENSP00000204566.2	NP_057714.1	chr15	64963021	64989914		BIALLELIC		608181		Green			1	0	0	0	0
SPG7	ENSG00000197912.18	ENST00000645818.2	NM_003119.4	ENSP00000495795.2	NP_003110.1	chr16	89508402	89557766		BOTH		602783		Green			1	2	0	0	2
SPR	ENSG00000116096.9	ENST00000234454.6	NM_003124.5	ENSP00000234454.5	NP_003115.1	chr2	72887407	72892158		BIALLELIC		182125	Green		Green	Dystonia/Parkinsonism	3	0	0	0	0
SQSTM1	ENSG00000161011.22	ENST00000389805.9	NM_003900.5	ENSP00000374455.4	NP_003891.1	chr5	179820904	179838078		MONOALLELIC		601530		Green			1	0	0	0	0
SS18L1	ENSG00000184402.16	ENST00000331758.8	NM_198935.3	ENSP00000333012.3	NP_945173.1	chr20	62143768	62182514		MONOALLELIC		606472		Green			1	0	0	0	0
STUB1	ENSG00000103266.13	ENST00000219548.9	NM_005861.4	ENSP00000219548.4	NP_005852.2	chr16	680409	682801		BOTH		607207		Green			1	0	0	0	0
SYNJ1	ENSG00000159082.20	ENST00000674351.1	NM_203446.3	ENSP00000501530.1	NP_982271.3	chr21	32628762	32728013		BIALLELIC		604297	Green	Green	Green	Parkinsonism	4	1	0	0	1
TAF1	ENSG00000147133.20	ENST00000423759.6	NM_004606.5	ENSP00000406549.2	NP_004597.3	chrX	71366356	71466005		X-LINKED		313650	Amber	Amber	Amber	Dystonia/Parkinsonism	4	0	0	0	0
TARDBP	ENSG00000120948.21	ENST00000240185.8	NM_007375.4	ENSP00000240185.4	NP_031401.1	chr1	11012653	11025492		MONOALLELIC		605078		Green			1	0	0	0	0
TBK1	ENSG00000183735.13	ENST00000331710.10	NM_013254.4	ENSP00000329967.5	NP_037386.1	chr12	64452119	64502114		MONOALLELIC		604834		Green	Green		2	0	0	0	0
TBP	ENSG00000112592.17	ENST00000392092.7	NM_003194.5	ENSP00000375942.2	NP_003185.1	chr6	170554368	170572859			Monoallelic	600075				SCA	1	0	0	0	0
TH	ENSG00000180176.17	ENST00000352909.8	NM_000360.4	ENSP00000325951.4	NP_000351.2	chr11	2163928	2171815		BIALLELIC		191290	Green			Dystonia/Parkinsonism	2	0	0	0	0
THAP1	ENSG00000131931.10	ENST00000254250.7	NM_018105.3	ENSP00000254250.3	NP_060575.1	chr8	42836673	42843325		MONOALLELIC		609520			Green	Dystonia	2	0	0	0	0
TIMM8A	ENSG00000126953.10	ENST00000372902.4	NM_004085.4	ENSP00000361993.3	NP_004076.1	chrX	101345660	101348742		X-LINKED		300356			Green		1	0	0	0	0
TMEM240	ENSG00000205090.10	ENST00000378733.9	NM_001114748.2	ENSP00000368007.4	NP_001108220.1	chr1	1534777	1540624		MONOALLELIC		616101		Green			1	0	0	0	0
TOR1A	ENSG00000136827.13	ENST00000351698.5	NM_000113.3	ENSP00000345719.4	NP_000104.1	chr9	129812941	129824136		MONOALLELIC		605204			Green	Dystonia	2	0	0	0	0
TREM2	ENSG00000095970.19	ENST00000373113.8	NM_018965.4	ENSP00000362205.3	NP_061838.1	chr6	41158507	41163116		BIALLELIC		605086		Green			1	0	0	0	0
TREX1	ENSG00000213689.14	ENST00000625293.3	NM_033629.6	ENSP00000486676.2	NP_338599.1	chr3	48466229	48467645		BOTH		606609		Green			1	0	0	0	0
TTC19	ENSG00000011295.18	ENST00000261647.10	NM_017775.4	ENSP00000261647.5	NP_060245.3	chr17	15999823	16029404		BIALLELIC		613814		Green			1	0	0	0	0
TTR	ENSG00000118271.14	ENST00000237014.8	NM_000371.4	ENSP00000237014.4	NP_000362.1	chr18	31591876	31598821		MONOALLELIC		176300		Green			1	0	0	0	0
TUBA4A	ENSG00000127824.17	ENST00000248437.9	NM_006000.3	ENSP00000248437.4	NP_005991.1	chr2	219249709	219253918		MONOALLELIC		191110		Green			1	0	0	0	0
TUBB4A	ENSG00000104833.13	ENST00000264071.7	NM_006087.4	ENSP00000264071.1	NP_006078.2	chr19	6494318	6502309		MONOALLELIC		602662	Green	Amber	Green		3	0	0	0	0
TYROBP	ENSG00000011600.14	ENST00000262629.9	NM_003332.4	ENSP00000262629.3	NP_003323.1	chr19	35904402	35908295		BIALLELIC		604142		Green			1	0	0	0	0
UBQLN2	ENSG00000188021.9	ENST00000338222.7	NM_013444.4	ENSP00000345195.5	NP_038472.2	chrX	56563626	56567868		X-LINKED		300264		Green			1	0	0	0	0
UCHL1	ENSG00000154277.15	ENST00000284440.9	NM_004181.5	ENSP00000284440.4	NP_004172.2	chr4	41256927	41268455		BOTH		191342			Amber		1	0	0	0	0
UQCRC1	ENSG00000010256.14	ENST00000203407.6	NM_003365.3	ENSP00000203407.5	NP_003356.2	chr3	48599001	48609646		MONOALLELIC		191328		Amber			1	0	0	0	0
VAMP2	ENSG00000220205.12	ENST00000316509.11	NM_014232.3	ENSP00000314214.6	NP_055047.2	chr17	8159148	8162948		MONOALLELIC		185881			Amber		1	0	0	0	0
VAPB	ENSG00000124164.18	ENST00000475243.6	NM_004738.5	ENSP00000417175.1	NP_004729.1	chr20	58389228	58451101		MONOALLELIC		605704		Green			1	0	0	0	0
VCP	ENSG00000165280.20	ENST00000358901.11	NM_007126.5	ENSP00000351777.6	NP_009057.1	chr9	35056063	35072625		MONOALLELIC		601023		Green			1	1	0	0	1
VPS13A	ENSG00000197969.15	ENST00000360280.8	NM_033305.3	ENSP00000353422.3	NP_150648.2	chr9	77177533	77421537		BIALLELIC		605978	Green	Green	Green		3	0	1	0	1
VPS13C	ENSG00000129003.20	ENST00000644861.2	NM_020821.3	ENSP00000493560.2	NP_065872.1	chr15	61852388	62060447		BIALLELIC		608879		Amber		Parkinsonism	2	0	0	0	0
VPS16	ENSG00000215305.12	ENST00000380445.8	NM_022575.4	ENSP00000369810.3	NP_072097.2	chr20	2840744	2866732		MONOALLELIC		608550			Green	Dystonia	2	0	0	0	0
VPS35	ENSG00000069329.21	ENST00000299138.12	NM_018206.6	ENSP00000299138.7	NP_060676.2	chr16	46656131	46689178		MONOALLELIC		601501	Green	Green	Green	Parkinsonism	4	0	0	0	0
VPS41	ENSG00000006715.18	ENST00000310301.9	NM_014396.4	ENSP00000309457.4	NP_055211.2	chr7	38722973	38909191		BIALLELIC		605485			Amber		1	0	0	0	0
VRK1	ENSG00000100749.11	ENST00000216639.8	NM_003384.3	ENSP00000216639.3	NP_003375.1	chr14	96797381	96881609		BIALLELIC		602168	Green	Green			2	0	0	0	0
WDR45	ENSG00000196998.21	ENST00000376372.9	NM_001029896.2	ENSP00000365551.3	NP_001025067.1	chrX	49074441	49079887		X-LINKED		300526		Green	Green		2	0	0	0	0
XK	ENSG00000047597.8	ENST00000378616.5	NM_021083.4	ENSP00000367879.3	NP_066569.1	chrX	37685790	37732130		X-LINKED		314850		Green	Amber		2	0	0	0	0
XPR1	ENSG00000143324.16	ENST00000367590.9	NM_004736.4	ENSP00000356562.4	NP_004727.2	chr1	180632021	180890279		MONOALLELIC		605237		Green	Green	Brain calcification associated movement disorder	3	0	0	0	0
YY1	ENSG00000100811.16	ENST00000262238.10	NM_003403.5	ENSP00000262238.4	NP_003394.1	chr14	100239143	100282788		MONOALLELIC		600013			Amber		1	0	0	0	0

## Sheet: Table S2
Table S2 - List of diagnosed probands
StudyStage	Recruitment	Onset	Sex	FamilyHistory?	Consanguinity?	FamilyType	Inheritance	Gene	GenomicVariant	cDNAvariant	ProteinVariant	Assembly	VariantType	VariantEffect	ObservedStatus	DifferentialDiagnosis	SupportingPhenotypes	Supporting Literature	GeneReview
GEL-solved	Complex Parkinsonism (includes pallido-pyramidal syndromes)	EOPD	Male	Yes	No	Singleton		ATXN3	NC_000014.9:g.92071010ins	NC_000014.9(NM_004993.6):c.913ins	NC_000014.9(NP_004984.2):p.(Gln304ins)	GRCh38	expansion	repeat expansion	heterozygous
GEL-solved	Complex Parkinsonism (includes pallido-pyramidal syndromes)	LOPD	Female	Yes	No	Trio (Proband, unaffected Mother and unaffected Sib)	Not inherited from unaffected mother, not in unaffected sib	DCTN1	NC_000002.11:g.74605195C>T	NC_000002.11(NM_004082.5):c.211G>A	NC_000002.11(NP_004073.2):p.(Gly71Arg)	GRCh37	SNV	missense	heterozygous
GEL-solved	Complex Parkinsonism (includes pallido-pyramidal syndromes)	EOPD	Male	NA	No	Singleton		DYNC1H1	NC_000014.9:g.101983252A>G	NC_000014.9(NM_001376.5):c.1195A>G	NC_000014.9(NP_001367.2):p.(Arg399Gly)	GRCh38	SNV	missense	heterozygous
GEL-solved	Early onset and familial Parkinson's disease	EOPD	Male	No	No	Singleton		GBA1	NC_000001.11:g.155236376C>T| NC_000001.11:g.155238650C>T	NC_000001.11(NM_000157.4):c.1093G>A| NC_000001.11(NM_000157.4):c.455G>A	NC_000001.11(NP_000148.2):p.(Glu365Lys)| NC_000001.11(NP_000148.2):p.(Gly152Glu)	GRCh38	SNV| SNV	missense| missense	compound het?
GEL-solved	Early onset and familial Parkinson's disease	LOPD	Female	NA	No	Duo (Proband & unaffected Mother)	Not inherited from unaffected mother	GBA1	NC_000001.11:g.155240629C>T	NC_000001.11(NM_000157.4):c.115+1G>A		GRCh38	SNV	splice donor	heterozygous
GEL-solved	Early onset and familial Parkinson's disease	LOPD	Female	Yes	No	Singleton		GBA1	NC_000001.11:g.155236277G>A	NC_000001.11(NM_000157.4):c.1192C>T	NC_000001.11(NP_000148.2):p.(Arg398Ter)	GRCh38	SNV	stop-gain	heterozygous
GEL-solved	Early onset and familial Parkinson's disease	LOPD	Female	Yes	No	Singleton		GBA1	NC_000001.11:g.155240629C>T	NC_000001.11(NM_000157.4):c.115+1G>A		GRCh38	SNV	splice donor	heterozygous
GEL-solved	Complex Parkinsonism (includes pallido-pyramidal syndromes)	LOPD	Male	Yes	No	Singleton		GBA1	NC_000001.11:g.155238215T>C	NC_000001.11(NM_000157.4):c.680A>G	NC_000001.11(NP_000148.2):p.(Asn227Ser)	GRCh38	SNV	missense	heterozygous
GEL-solved	Early onset and familial Parkinson's disease	JOPD	Male	No	No	Trio (Proband & unaffected Parents)	de novo	KCNC1	NC_000011.10:g.17772124G>A	NC_000011.10(NM_001112741.2):c.1030G>A	NC_000011.10(NP_001106212.1):p.(Glu344Lys)	GRCh38	SNV	missense	heterozygous
GEL-solved	Complex Parkinsonism (includes pallido-pyramidal syndromes)	LOPD	Female	No	No	Singleton		KIF5A	NC_000012.12:g.57569534G>A	NC_000012.12(NM_004984.4):c.969-1G>A		GRCh38	SNV	splice acceptor	heterozygous
GEL-solved	Early onset and familial Parkinson's disease	EOPD	Male	No	No	Singleton		LRRK2	NC_000012.11:g.40734202G>A	NC_000012.11(NM_198578.4):c.6055G>A	NC_000012.11(NP_940980.4):p.(Gly2019Ser)	GRCh37	SNV	missense	heterozygous
GEL-solved	Early onset and familial Parkinson's disease	EOPD	Female	Yes	No	Singleton		LRRK2	NC_000012.12:g.40340400G>A	NC_000012.12(NM_198578.4):c.6055G>A	NC_000012.12(NP_940980.4):p.(Gly2019Ser)	GRCh38	SNV	missense	heterozygous
GEL-solved	Early onset and familial Parkinson's disease	LOPD	Female	No	No	Singleton		LRRK2	NC_000012.12:g.40340400G>A	NC_000012.12(NM_198578.4):c.6055G>A	NC_000012.12(NP_940980.4):p.(Gly2019Ser)	GRCh38	SNV	missense	heterozygous
GEL-solved	Early onset and familial Parkinson's disease	LOPD	Female	Yes	No	Singleton		LRRK2	NC_000012.12:g.40340400G>A	NC_000012.12(NM_198578.4):c.6055G>A	NC_000012.12(NP_940980.4):p.(Gly2019Ser)	GRCh38	SNV	missense	heterozygous
GEL-solved	Early onset and familial Parkinson's disease	LOPD	Male	Yes	No	Singleton		LRRK2	NC_000012.12:g.40310434C>T	NC_000012.12(NM_198578.4):c.4321C>T	NC_000012.12(NP_940980.4):p.(Arg1441Cys)	GRCh38	SNV	missense	heterozygous
GEL-solved	Early onset and familial Parkinson's disease	LOPD	Male	Yes	No	Singleton		LRRK2	NC_000012.12:g.40340400G>A	NC_000012.12(NM_198578.4):c.6055G>A	NC_000012.12(NP_940980.4):p.(Gly2019Ser)	GRCh38	SNV	missense	heterozygous
GEL-solved	Early onset and familial Parkinson's disease	EOPD	Male	No	No	Duo (Proband & unaffected sib)	Not in unaffected sib	MAPT	NC_000017.10:g.44087754C>T	NC_000017.10(NM_001377265.1):c.2077C>T	NC_000017.10(NP_001364194.1):p.(Pro693Ser)	GRCh37	SNV	missense	heterozygous
GEL-solved	Complex Parkinsonism (includes pallido-pyramidal syndromes)	EOPD	Female	NA	No	Singleton		NA				GRCh38	expansion	repeat expansion	heterozygous
GEL-solved	Complex Parkinsonism (includes pallido-pyramidal syndromes)	JOPD	Male	NA	No	Singleton		OPA1	NC_000003.12:g.193667168_193667171del	NC_000003.12(NM_130837.3):c.2873-2_2874del		GRCh38	indel	splice acceptor	heterozygous
GEL-solved	Complex Parkinsonism (includes pallido-pyramidal syndromes)	JOPD	Male	Yes	No	Singleton		OPA1	NC_000003.12:g.193643527G>A	NC_000003.12(NM_130837.3):c.1378-1G>A		GRCh38	SNV	splice acceptor	heterozygous
GEL-solved	Early onset and familial Parkinson's disease	JOPD	Male	No	Yes	Trio (Proband & unaffected Parents)	Both unaffected parents heterozygous	PARK7	NC_000001.10:g.8045015_8045017del| NC_000001.10:g.8045015_8045017del	NC_000001.10(NM_007262.5):c.471_473del| NC_000001.10(NM_007262.5):c.471_473del	NC_000001.10(NP_009193.2):p.(Pro158del)| NC_000001.10(NP_009193.2):p.(Pro158del)	GRCh37	indel| indel	inframe deletion	homozygous
GEL-solved	Early onset and familial Parkinson's disease	EOPD	Female	NA	No	Singleton		PINK1	NC_000001.11:g.20645640T>C| NC_000001.11:g.20648994G>A	NC_000001.11(NM_032409.3):c.1040T>C| NC_000001.11(NM_032409.3):c.1252-1G>A	NC_000001.11(NP_115785.1):p.(Leu347Pro)	GRCh38	SNV| SNV	missense| splice acceptor	compound het?
GEL-solved	Early onset and familial Parkinson's disease	EOPD	Male	No	No	Singleton		PINK1	NC_000001.10:g.20975702T>C| NC_000001.10:g.20975702T>C	NC_000001.10(NM_032409.3):c.1466T>C| NC_000001.10(NM_032409.3):c.1466T>C	NC_000001.10(NP_115785.1):p.(Leu489Pro)| NC_000001.10(NP_115785.1):p.(Leu489Pro)	GRCh37	SNV| SNV	missense	homozygous
GEL-solved	Early onset and familial Parkinson's disease	EOPD	Female	NA	Yes	Trio (Proband & unaffected Parents)	Both unaffected parents heterozygous	PLA2G6	NC_000022.11:g.38112558C>T| NC_000022.11:g.38112558C>T	NC_000022.11(NM_003560.4):c.2222G>A| NC_000022.11(NM_003560.4):c.2222G>A	NC_000022.11(NP_003551.2):p.(Arg741Gln)| NC_000022.11(NP_003551.2):p.(Arg741Gln)	GRCh38	SNV| SNV	missense	homozygous
GEL-solved	Early onset and familial Parkinson's disease	EOPD	Female	No	No	Singleton		PRKN	NC_000006.12:g.161785839A>T| NC_000006.12:g.162443379_162443380del	NC_000006.12(NM_004562.3):c.804T>A| NC_000006.12(NM_004562.3):c.101_102del	NC_000006.12(NP_004553.2):p.(Cys268Ter)| NC_000006.12(NP_004553.2):p.(Gln34ArgfsTer5)	GRCh38	SNV| indel	stop-gain| frameshift	compound het?
GEL-solved	Early onset and familial Parkinson's disease	EOPD	Female	NA	No	Singleton		PRKN	NC_000006.12:g.161785820G>A| NC_000006.12:g.162262561_162262600del	NC_000006.12(NM_004562.3):c.823C>T| NC_000006.12(NM_004562.3):c.337_376del	NC_000006.12(NP_004553.2):p.(Arg275Trp)| NC_000006.12(NP_004553.2):p.(Pro113ThrfsTer51)	GRCh38	SNV| indel	missense| frameshift	compound het?
GEL-solved	Early onset and familial Parkinson's disease	EOPD	Male	Yes	No	Singleton		PRKN	NC_000006.12:g.161785820G>A| NC_000006.12:g.161785820G>A	NC_000006.12(NM_004562.3):c.823C>T| NC_000006.12(NM_004562.3):c.823C>T12	NC_000006.12(NP_004553.2):p.(Arg275Trp)| NC_000006.12(NP_004553.2):p.(Arg275Trp)	GRCh38	SNV| SNV	missense	homozygous
GEL-solved	Early onset and familial Parkinson's disease	EOPD	Male	Yes	No	Singleton		PRKN	NC_000006.12:g.162443379_162443380del| NC_000006.12:g.162443379_162443380del	NC_000006.12(NM_004562.3):c.101_102del| NC_000006.12(NM_004562.3):c.101_102del	NC_000006.12(NP_004553.2):p.(Gln34ArgfsTer5)| NC_000006.12(NP_004553.2):p.(Gln34ArgfsTer5)	GRCh38	indel| indel	frameshift	homozygous
GEL-solved	Early onset and familial Parkinson's disease	EOPD	Male	Yes	Yes	Trio (Proband, unaffected Father, affected Mother)	Affected Mother homozygous, unaffected Father heterozygous	PRKN	NC_000006.11:g.162610351_162875135del| NC_000006.11:g.162610351_162875135del	NC_000006.11(NM_004562.3):c.8-10630_534+11812del| NC_000006.11(NM_004562.3):c.8-10630_534+11812del	NC_000006.11(NP_004553.2):p.(Val3GlyfsTer7)| NC_000006.11(NP_004553.2):p.(Val3GlyfsTer7)	GRCh37	SV| SV	deletion	homozygous
GEL-solved	Early onset and familial Parkinson's disease	JOPD	Male	No	NA	Duo (proband & unaffected Father)	Unaffected Father heterozygous for missense	PRKN	NC_000006.12:g.161350208C>T| NC_000006.12:g.162262561_162262600del	NC_000006.12(NM_004562.3):c.1289G>A| NC_000006.12(NM_004562.3):c.337_376del	NC_000006.12(NP_004553.2):p.(Gly430Asp)| NC_000006.12(NP_004553.2):p.(Pro113ThrfsTer51)	GRCh38	SNV| indel	missense| frameshift	compound het?
GEL-solved	Early onset and familial Parkinson's disease	JOPD	Male	No	No	Singleton		PRKN	NC_000006.12:g.161350187G>A| NC_000006.12:g.161973317G>A	NC_000006.12(NM_004562.3):c.1310C>T| NC_000006.12(NM_004562.3):c.719C>T	NC_000006.12(NP_004553.2):p.(Pro437Leu)| NC_000006.12(NP_004553.2):p.(Thr240Met)	GRCh3815	SNV| SNV	missense| missense	compound het?
GEL-solved	Early onset and familial Parkinson's disease	JOPD	Female	Yes	No	Singleton		PRKN	NC_000006.12:g.162443379_162443380del| NC_000006.12:g.162443379_162443380del	NC_000006.12(NM_004562.3):c.101_102del| NC_000006.12(NM_004562.3):c.101_102del	NC_000006.12(NP_004553.2):p.(Gln34ArgfsTer5)| NC_000006.12(NP_004553.2):p.(Gln34ArgfsTer5)	GRCh38	indel| indel	frameshift	homozygous
GEL-solved	Early onset and familial Parkinson's disease	LOPD	Male	No	No	Singleton		PSEN1	NC_000014.9:g.73173621T>G	NC_000014.9(NM_000021.4):c.394T>G	NC_000014.9(NP_000012.1):p.(Ser132Ala)	GRCh38	SNV	missense	heterozygous
GEL-solved	Early onset and familial Parkinson's disease	EOPD	Female	Yes	No	Duo (Proband & unaffected Mother)	Not inherited from unaffected Mother	SNCA	NC_000004.12:g.89828154C>T	NC_000004.12(NM_000345.4):c.152G>A	NC_000004.12(NP_000336.1):p.(Gly51Asp)	GRCh38	SNV	missense	heterozygous
GEL-solved	Complex Parkinsonism (includes pallido-pyramidal syndromes)	JOPD	Female	NA	NA	Duo (Proband & unaffected Father)	Not inherited from unaffected Father	SPAST	NC_000002.12:g.32141906G>A	NC_000002.12(NM_014946.4):c.1496G>A	NC_000002.12(NP_055761.2):p.(Arg499His)	GRCh38	SNV	missense	heterozygous
GEL-solved	Early onset and familial Parkinson's disease	EOPD	Male	NA	No	Singleton		SPG7	NC_000016.10:g.89529579dup| NC_000016.10:g.89546737C>T	NC_000016.10(NM_003119.4):c.861dup| NC_000016.10(NM_003119.4):c.1529C>T	NC_000016.10(NP_003110.1):p.(Asn288Ter)| NC_000016.10(NP_003110.1):p.(Ala510Val)	GRCh38	indel| SNV	frameshift| missense	compound het?
GEL-solved	Complex Parkinsonism (includes pallido-pyramidal syndromes)	LOPD	Female	No	No	Singleton		SPG7	NC_000016.10:g.89546657_89546665del| NC_000016.10:g.89546737C>T	NC_000016.10(NM_003119.4):c.1450-1_1457del| NC_000016.10(NM_003119.4):c.1529C>T	|NC_000016.10(NP_003110.1):p.(Ala510Val)	GRCh38	indel| SNV	splice acceptor| missense	compound het?
GEL-solved	Early onset and familial Parkinson's disease	EOPD	Male	NA	No	Trio (Proband & unaffected Parents)	Both unaffected parents heterozygous	SYNJ1	NC_000021.9:g.32695106C>T| NC_000021.9:g.32695106C>T	NC_000021.9(NM_203446.3):c.656G>A| NC_000021.9(NM_203446.3):c.656G>A	NC_000021.9(NP_982271.3):p.(Arg219Gln)| NC_000021.9(NP_982271.3):p.(Arg219Gln)	GRCh38	SNV| SNV	missense	homozygous
GEL-solved	Early onset and familial Parkinson's disease	LOPD	Male	Yes	No	Singleton		VCP	NC_000009.12:g.35065352G>A	NC_000009.12(NM_007126.5):c.475C>T	NC_000009.12(NP_009057.1):p.(Arg159Cys)	GRCh38	SNV	missense	heterozygous
Stage 1	Complex Parkinsonism (includes pallido-pyramidal syndromes)	LOPD	Male	No	No	Singleton		ARSA	NC_000022.11:g.50627338G>A	NC_000022.11(NM_000487.6):c.293C>T	NC_000022.11(NP_000478.3):p.(Ser98Phe)	GRCh38	SNV	missense	heterozygous
Stage 1	Early onset and familial Parkinson's disease	LOPD	Female	Yes	No	Singleton		ARSA	NC_000022.11:g.50626877G>A	NC_000022.11(NM_000487.6):c.641C>T	NC_000022.11(NP_000478.3):p.(Ala214Val)	GRCh38	SNV	missense	heterozygous
Stage 1	Early onset and familial Parkinson's disease	LOPD	Male	Yes	No	Singleton		ARSA	NC_000022.11:g.50626264C>T	NC_000022.11(NM_000487.6):c.869G>A	NC_000022.11(NP_000478.3):p.(Arg290His)	GRCh38	SNV	missense	heterozygous
Stage 1	Early onset and familial Parkinson's disease	LOPD	Male	Yes	No	Singleton		ARSA	NC_000022.11:g.50626709G>A	NC_000022.11(NM_000487.6):c.736C>T	NC_000022.11(NP_000478.3):p.(Arg246Cys)	GRCh38	SNV	missense	heterozygous
Stage 1	Complex Parkinsonism (includes pallido-pyramidal syndromes)	LOPD	Male	No	NA	Singleton		CSF1R	NC_000005.10:g.150080942_150080945dup	NC_000005.10(NM_001288705.3):c.129_132dup	NC_000005.10(NP_001275634.1):p.(Asn45GlyfsTer20)	GRCh38	indel	frameshift	heterozygous
Stage 1	Early onset and familial Parkinson's disease	EOPD	Female	No	No	Singleton		GBA1	NC_000001.11:g.155235843T>C| NC_000001.11:g.155235843T>C	NC_000001.11(NM_000157.4):c.1226A>G| NC_000001.11(NM_000157.4):c.1226A>G	NC_000001.11(NP_000148.2):p.(Asn409Ser)| NC_000001.11(NP_000148.2):p.(Asn409Ser)	GRCh38	SNV	missense	homozygous
Stage 1	Early onset and familial Parkinson's disease	EOPD	Male	NA	No	Singleton		LRRK2	NC_000012.12:g.40340400G>A	NC_000012.12(NM_198578.4):c.6055G>A	NC_000012.12(NP_940980.4):p.(Gly2019Ser)	GRCh38	SNV	missense	heterozygous
Stage 1	Early onset and familial Parkinson's disease	EOPD	Female	No	NA	Singleton		LRRK2	NC_000012.12:g.40340400G>A	NC_000012.12(NM_198578.4):c.6055G>A	NC_000012.12(NP_940980.4):p.(Gly2019Ser)	GRCh38	SNV	missense	heterozygous
Stage 1	Early onset and familial Parkinson's disease	LOPD	Male	Yes	No	Duo (Proband & affected sib)	Variant shared by affected sib	LRRK2	NC_000012.12:g.40340400G>A	NC_000012.12(NM_198578.4):c.6055G>A	NC_000012.12(NP_940980.4):p.(Gly2019Ser)	GRCh38	SNV	missense	heterozygous
Stage 1	Complex Parkinsonism (includes pallido-pyramidal syndromes)	LOPD	Female	No	No	Singleton		LRRK2	NC_000012.12:g.40340400G>A	NC_000012.12(NM_198578.4):c.6055G>A	NC_000012.12(NP_940980.4):p.(Gly2019Ser)	GRCh38	SNV	missense	heterozygous
Stage 1	Early onset and familial Parkinson's disease	LOPD	Male	No	No	Singleton		LRRK2	NC_000012.12:g.40340400G>A	NC_000012.12(NM_198578.4):c.6055G>A	NC_000012.12(NP_940980.4):p.(Gly2019Ser)	GRCh38	SNV	missense	heterozygous
Stage 1	Complex Parkinsonism (includes pallido-pyramidal syndromes)	LOPD	Female	Yes	No	Singleton		LRRK2	NC_000012.12:g.40340400G>A	NC_000012.12(NM_198578.4):c.6055G>A	NC_000012.12(NP_940980.4):p.(Gly2019Ser)	GRCh38	SNV	missense	heterozygous
Stage 1	Early onset and familial Parkinson's disease	LOPD	Female	Yes	No	Singleton		LRRK2	NC_000012.12:g.40340400G>A	NC_000012.12(NM_198578.4):c.6055G>A	NC_000012.12(NP_940980.4):p.(Gly2019Ser)	GRCh38	SNV	missense	heterozygous
Stage 1	Early onset and familial Parkinson's disease	LOPD	Male	Yes	No	Singleton		LRRK2	NC_000012.12:g.40340400G>A	NC_000012.12(NM_198578.4):c.6055G>A	NC_000012.12(NP_940980.4):p.(Gly2019Ser)	GRCh38	SNV	missense	heterozygous
Stage 1	Early onset and familial Parkinson's disease	EOPD	Female	NA	NA	Singleton		PINK1	NC_000001.11:g.20648995G>C| NC_000001.11:g.20645224_20646381del	NC_000001.11(NM_032409.3):c.1252G>C| NC_000001.11(NM_032409.3):c.960-336_1123+658del	NC_000001.11(NP_115785.1):p.(Val418Leu)| NC_000001.11(NP_115785.1):p.(Asn320LysfsTer17)	GRCh38	SNV| SV	missense| frameshift	compound het?
Stage 1	Early onset and familial Parkinson's disease	EOPD	Female	No	No	Trio (Proband & unaffected Parents)	Unaffected Mother heterozygous for p.(Thr642Ala). Unaffected Father heterozygous for p.(Ala80Thr)	PLA2G6	NC_000022.10:g.38511644T>C| NC_000022.10:g.38541632C>T	NC_000022.10(NM_003560.4):c.1924A>G| NC_000022.10(NM_003560.4):c.238G>A	NC_000022.10(NP_003551.2):p.(Thr642Ala)| NC_000022.10(NP_003551.2):p.(Ala80Thr)	GRCh37	SNV| SNV	missense| missense	compound het
Stage 1	Early onset and familial Parkinson's disease	EOPD	Male	Yes	No	Family (Proband, unaffected parents & affected sib)	Unaffected Mother heterozygous for deletion. Unaffected Father heterozygous for indel. Affected sib inherited both variants	PRKN	NC_000006.12:g.162443327del| NC_000006.12:g.161812764_162167210del	NC_000006.12(NM_004562.3):c.155del| NC_000006.12(NM_004562.3):c.534+33922_735-26855del	NC_000006.12(NP_004553.2):p.(Asn52MetfsTer29)| NC_000006.12(NP_004553.2):p.(Gly179GlufsTer29)	GRCh38	SV| SV	frameshift| frameshift	compound het
Stage 1	Early onset and familial Parkinson's disease	EOPD	Male	No	No	Singleton		PRKN	NC_000006.12:g.161556155_161662030del| NC_000006.12:g.162131417_162380362del	NC_000006.12(NM_004562.3):c.872-92613_934-7151del| NC_000006.12(NM_004562.3):c.171+62948_534+69714del	NC_000006.12(NP_004553.2):p.(Ala291ValfsTer35)| NC_000006.12(NP_004553.2):p.(Asn58_Gln178del)	GRCh38	SV| SV	frameshift | inframe deletion	compound het?
Stage 1	Early onset and familial Parkinson's disease	EOPD	Male	No	No	Singleton		PRKN	NC_000006.12:g.161785820G>A| NC_000006.12:g.162258305_162361676del	NC_000006.12(NM_004562.3):c.823C>T| NC_000006.12(NM_004562.3):c.171+81634_412+4220del	NC_000006.12(NP_004553.2):p.(Arg275Trp)| NC_000006.12(NP_004553.2):p.(Asn58GlnfsTer39)	GRCh38	SNV| SV	missense| frameshift	compound het?
Stage 1	Early onset and familial Parkinson's disease	EOPD	Male	No	No	Singleton		PRKN	NC_000006.12:g.161785820G>A| NC_000006.12:g.162258501_162373306del	NC_000006.12(NM_004562.3):c.823C>T| NC_000006.12(NM_004562.3):c.171+70004_412+4024del	NC_000006.12(NP_004553.2):p.(Arg275Trp)| NC_000006.12(NP_004553.2):p.(Asn58GlnfsTer39)	GRCh38	SNV| SV	missense| frameshift	compound het?
Stage 1	Early onset and familial Parkinson's disease	EOPD	Male	No	No	Singleton		PRKN	NC_000006.12:g.162443379_162443380del| NC_000006.12:g.161572727G>C	NC_000006.12(NM_004562.3):c.101_102del| NC_000006.12(NM_004562.3):c.872-3311C>G	NC_000006.12(NP_004553.2):p.(Gln34ArgfsTer5)| NC_000006.12(NP_004553.2):p.(=)	GRCh38	indel| SNV	frameshift| splice	compound het?
Stage 1	Early onset and familial Parkinson's disease	EOPD	Male	NA	No	Singleton		PRKN	NC_000006.12:g.161785820G>A| NC_000006.12:g.162456049_162777520del	NC_000006.12(NM_004562.3):c.823C>T| NC_000006.12(NM_004562.3):c.-49851_8-12575del	NC_000006.12(NP_004553.2):p.(Arg275Trp)| NC_000006.12(NP_004553.2):p.?	GRCh38	SNV| SV	missense| start-loss	compound het?
Stage 1	Early onset and familial Parkinson's disease	EOPD	Female	No	Yes	Singleton		PRKN	NC_000006.12:g.162230539_162284521del| NC_000006.12:g.162230539_162284521del	NC_000006.12(NM_004562.3):c.172-21756_413-29287del |NC_000006.12(NM_004562.3):c.172-21756_413-29287del	NC_000006.12(NP_004553.2):p.(Asn58GlnfsTer39)| NC_000006.12(NP_004553.2):p.(Asn58GlnfsTer39)	GRCh38	SV| SV	frameshift	homozygous
Stage 1	Early onset and familial Parkinson's disease	JOPD	Male	Yes	No	Singleton		PRKN	NC_000006.12:g.161785820G>A| NC_000006.12:g.162073218_162247168del	NC_000006.12(NM_004562.3):c.823C>T| NC_000006.12(NM_004562.3):c.412+15357_535-19044del	NC_000006.12(NP_004553.2):p.(Arg275Trp)| NC_000006.12(NP_004553.2):p.(Ala138GlyfsTer7)	GRCh38	SNV| SV	missense| frameshift	compound het?
Stage 1	Early onset and familial Parkinson's disease	LOPD	Male	NA	No	Singleton		PRKN	NC_000006.12:g.161785820G>A| NC_000006.12:g.162193900_162325144del	NC_000006.12(NM_004562.3):c.823C>T| NC_000006.12(NM_004562.3):c.172-62379_534+7231del	NC_000006.12(NP_004553.2):p.(Arg275Trp)| NC_000006.12(NP_004553.2):p.(Asn58_Gln178del)	GRCh38	SNV| SV	missense| inframe deletion	compound het?
Stage 1	Complex Parkinsonism (includes pallido-pyramidal syndromes)	EOPD	Male	Yes	Yes	Singleton		SNCA	NC_000004.12:g.89570721_90822766del	NC_000004.12(NM_001145065.2):c.-557152_2094+6921del		GRCh38	SV	deletion (whole gene)	heterozygous
Stage 1	Complex Parkinsonism (includes pallido-pyramidal syndromes)	LOPD	Male	No	No	Singleton		SNCA	NC_000004.12:g.89731017C>G	NC_000004.12(NM_000345.4):c.307-1740G>C	NC_000004.12(NP_000336.1):p.(=)	GRCh38	SNV	splice	heterozygous
Stage 1	Complex Parkinsonism (includes pallido-pyramidal syndromes)	JOPD	Male	Yes	No	Trio (Proband, unaffected Mother and affected Sib)	Unaffected Mother heterozygous for deletion. Affected sib has both variants	SPG11	NC_000015.10:g.44596282G>C| NC_000015.10:g.44569209_44578773del	NC_000015.10(NM_025137.4):c.4235C>G| NC_000015.10(NM_025137.4):c.5867-3732_6585+189del	NC_000015.10(NP_079413.3):p.(Ser1412Ter)| NC_000015.10(NP_079413.3):p.(Thr1956LysfsTer21)	GRCh38	SNV| SV	stop-gain| frameshift	compound het?
Stage 1	Early onset and familial Parkinson's disease	EOPD	Male	No	Yes	Singleton		VPS13A	NC_000009.12:g.77256177T>C| NC_000009.12:g.77368098G>A	NC_000009.12(NM_033305.3):c.2288+3825T>C| NC_000009.12(NM_033305.3):c.8515G>A	NC_000009.12(NP_150648.2):p.(=)| NC_000009.12(NP_150648.2):p.(Asp2839Asn)	GRCh38	SNV| SNV	splice| missense	compound het?
Stage 2	Complex Parkinsonism (includes pallido-pyramidal syndromes)	LOPD	Male	No	No	Singleton		APP	NC_000021.9:g.25891796C>T	NC_000021.9(NM_000484.4):c.2137G>A	NC_000021.9(NP_000475.1):p.(Ala713Thr)	GRCh38	SNV	missense	heterozygous	Alzheimer's Disease	Vascular dementia		https://www.ncbi.nlm.nih.gov/books/NBK1161/
Stage 2	Early onset and familial Parkinson's disease	EOPD	Female	No	No	Singleton		ATM	NC_000011.10:g.108289774A>G| NC_000011.10:g.108343255_108343267del	NC_000011.10(NM_000051.4):c.4409A>G| NC_000011.10(NM_000051.4):c.8305_8317del	NC_000011.10(NP_000042.3):p.(Tyr1470Cys)| NC_000011.10(NP_000042.3):p.(Trp2769LeufsTer33)	GRCh38	SNV| indel	missense| frameshift	compound het?	Ataxia-telangiectasia	Dystonia, recurrent malignancies, COPD	DOI:10.1016/j.parkreldis.2017.12.009	https://www.ncbi.nlm.nih.gov/books/NBK26468/
Stage 2	Early onset and familial Parkinson's disease	LOPD	Female	No	No	Singleton		DNAJC13	NC_000003.12:g.132477995A>G	NC_000003.12(NM_015268.4):c.2564A>G	NC_000003.12(NP_056083.3):p.(Asn855Ser)	GRCh38	SNV	missense	heterozygous	Late-onset Parkinson's Disease	LOPD	DOI:10.1016/j.neulet.2019.04.043, DOI:10.1093/hmg/ddt570	https://www.ncbi.nlm.nih.gov/books/NBK1223/
Stage 2	Early onset and familial Parkinson's disease	EOPD	Male	No	No	Singleton		KCTD17	NC_000022.11:g.37057420G>A	NC_000022.11(NM_001282684.2):c.413G>A	NC_000022.11(NP_001269613.2):p.(Arg138His)	GRCh38	SNV	missense	heterozygous	Dystonia	Dystonia, dysphonia	DOI:10.1016/j.ajhg.2015.04.008, DOI:10.1016/j.parkreldis.2020.07.026, DOI:10.1016/j.parkreldis.2018.12.001	https://www.ncbi.nlm.nih.gov/books/NBK1414/
Stage 2	Early onset and familial Parkinson's disease	EOPD	Female	Yes	NA	Singleton		NOTCH3	NC_000019.10:g.15187213G>A	NC_000019.10(NM_000435.3):c.1732C>T	NC_000019.10(NP_000426.2):p.(Arg578Cys)	GRCh38	SNV	missense	heterozygous	Cerebral autosomal dominant arteriopathy with subcortical infarcts and leukoencephalopathy (CADASIL)	Visual disturbance, hallucinations, psychosis, (post-partum haemorrhage??)	DOI:10.12659/MSMBR.918830, DOI:10.1016/j.clineuro.2021.106833, DOI:10.1212/NXG.0000000000000639	https://www.ncbi.nlm.nih.gov/books/NBK1500/
Stage 2	Early onset and familial Parkinson's disease	EOPD	Male	No	No	Duo (proband and unaffected Mother)	Unaffected Mother heterozygous for p.(Ile1061Thr)	NPC1	NC_000018.10:g.23536736A>G| NC_000018.10:g.23545063C>A	NC_000018.10(NM_000271.5):c.3182T>C| NC_000018.10(NM_000271.5):c.1844G>T	NC_000018.10(NP_000262.2):p.(Ile1061Thr)| NC_000018.10(NP_000262.2):p.(Arg615Leu)	GRCh38	SNV| SNV	missense| missense	compound het?	Niemann-Pick disease	Splenomegaly, obesity, abnormal saccadic eye movements	DOI: 10.1017/cjn.2021.222	https://www.ncbi.nlm.nih.gov/books/NBK1296/
Stage 2	Complex Parkinsonism (includes pallido-pyramidal syndromes)	EOPD	Female	No	No	Singleton		SORL1	NC_000011.10:g.121590147G>T	NC_000011.10(NM_003105.6):c.4186G>T	NC_000011.10(NP_003096.2):p.(Asp1396Tyr)	GRCh38	SNV	missense	heterozygous	Alzheimer's Disease	Dementia, senility		https://www.ncbi.nlm.nih.gov/books/NBK1161/
Stage 2	Early onset and familial Parkinson's disease	LOPD	Male	Yes	No	Singleton		SPAST	NC_000002.12:g.32063861G>C	NC_000002.12(NM_014946.4):c.30G>C	NC_000002.12(NP_055761.2):p.(Lys10Asn)	GRCh38	SNV	missense	heterozygous	Spastic paraplegia	Muscular dystrophy, trigger finger	DOI:10.1002/ana.20652, DOI:10.1001/archneurol.2009.19	https://www.ncbi.nlm.nih.gov/books/NBK1160/
Stage 2	Early onset and familial Parkinson's disease	EOPD	Male	NA	No	Singleton		SPG7	NC_000016.10:g.89526347C>T| NC_000016.10:g.89546657_89546665del	NC_000016.10(NM_003119.4):c.637C>T| NC_000016.10(NM_003119.4):c.1450-1_1457del	NC_000016.10(NP_003110.1):p.(Arg213Ter)	GRCh38	SNV| indel	stop-gain| frameshift	compound het?	Spastic paraplegia	Visual field defects, limb muscle weakness, spastic paraparesis, memory impairment, pes cavus		https://www.ncbi.nlm.nih.gov/books/NBK1107/
Stage 2	Complex Parkinsonism (includes pallido-pyramidal syndromes)	LOPD	Male	No	No	Singleton		SPG7	NC_000016.10:g.89546737C>T| NC_000016.10:g.89529580G>C	NC_000016.10(NM_003119.4):c.1529C>T| NC_000016.10(NM_003119.4):c.861+1G>C	NC_000016.10(NP_003110.1):p.(Ala510Val)	GRCh38	SNV| SNV	missense| splice	compound het?	Spastic paraplegia	Dependence on a wheelchair, limb muscle weakness, supranuclear gaze palsy, abnormal saccadic eye movements		https://www.ncbi.nlm.nih.gov/books/NBK1107/
Stage 2	Early onset and familial Parkinson's disease	EOPD	Male	No	No	Singleton		SQSTM1	NC_000005.10:g.179833096_179833097del	NC_000005.10(NM_003900.5):c.823_824del	NC_000005.10(NP_003891.1):p.(Ser275PhefsTer17)	GRCh38	indel	frameshift	heterozygous	Frontotemporal dementia and/or amyotrophic lateral sclerosis	Lower limb muscle weakness, poor coordination, speech therapy	DOI:10.1007/s00415-020-10283-x	https://www.ncbi.nlm.nih.gov/books/NBK1450/
Stage 2	Complex Parkinsonism (includes pallido-pyramidal syndromes)	LOPD	Female	No	No	Singleton		SQSTM1	NC_000005.10:g.179836543G>A	NC_000005.10(NM_003900.5):c.1273G>A	NC_000005.10(NP_003891.1):p.(Gly425Arg)	GRCh38	SNV	missense	heterozygous	Frontotemporal dementia and/or amyotrophic lateral sclerosis	Bulbar signs, difficulty walking, frequent falls, dysphagia, dysarthria	DOI:10.1007/s00415-020-10283-x	https://www.ncbi.nlm.nih.gov/books/NBK1450/
Stage 2	Complex Parkinsonism (includes pallido-pyramidal syndromes)	LOPD	Male	NA	NA	Singleton		TOR1A	NC_000009.12:g.129818752A>T	NC_000009.12(NM_000113.3):c.613T>A	NC_000009.12(NP_000104.1):p.(Phe205Ile)	GRCh38	SNV	missense	heterozygous	Dystonia	Limb spasticity, gait ataxia, essential tremor	DOI:10.1002/humu.22602, DOI:10.1016/j.nbd.2020.104851	https://www.ncbi.nlm.nih.gov/books/NBK1492/
Stage 2	Early onset and familial Parkinson's disease	EOPD	Male	Yes	No	Duo (Proband and unaffected family member)	Variant not in unaffected family member	TREX1	NC_000003.11:g.48508968A>G	NC_000003.11(NM_033629.6):c.914A>G	NC_000003.11(NP_338599.1):p.(Tyr305Cys)	GRCh37	SNV	missense	heterozygous	Retinal vasculopathy with cerebral leukoencephalopathy and systemic manifestations (RVCL-S)	Visual disturbance, cerebral cysts	DOI:10.1007/s00018-025-05645-5, DOI:10.1016/j.neurobiolaging.2022.11.013, DOI:10.1038/gene.2010.73	https://www.ncbi.nlm.nih.gov/books/NBK546576/
Stage 2	Early onset and familial Parkinson's disease	EOPD	Male	No	No	Singleton		VPS13C	NC_000015.10:g.61982562A>C| NC_000015.10:g.61951016C>G	NC_000015.10(NM_020821.3):c.1926T>G| NC_000015.10(NM_020821.3):c.4465G>C	NC_000015.10(NP_065872.1):p.(Asn642Lys)| NC_000015.10(NP_065872.1):p.(Gly1489Arg)	GRCh38	SNV| SNV	missense| missense	compound het?	Early-onset Parkinson's Disease	Early-onset, dysphagia, dysarthria, dysphasia, skeletal muscle atrophy	DOI:10.1016/j.ajhg.2016.01.014, DOI:10.1016/j.parkreldis.2021.11.031	https://www.ncbi.nlm.nih.gov/books/NBK1223/
Stage 2	Complex Parkinsonism (includes pallido-pyramidal syndromes)	LOPD	Male	NA	No	Singleton		VPS13C	NC_000015.10:g.61881582T>C| NC_000015.10:g.61962393T>C	NC_000015.10(NM_020821.3):c.9757A>G| NC_000015.10(NM_020821.3):c.3581A>G	NC_000015.10(NP_065872.1):p.(Ser3253Gly)| NC_000015.10(NP_065872.1):p.(His1194Arg)	GRCh38	SNV| SNV	missense| missense	compound het?	Early-onset Parkinson's Disease	Dementia, progressive supranuclear ophthalmoplegia	DOI:10.1016/j.ajhg.2016.01.014, DOI:10.1016/j.parkreldis.2021.11.031	https://www.ncbi.nlm.nih.gov/books/NBK1223/
Stage 2	Complex Parkinsonism (includes pallido-pyramidal syndromes)	LOPD	Male	No	No	Singleton		XK	NC_000023.11:g.37727981_37727984del	NC_000023.11(NM_021083.4):c.856_859del	NC_000023.11(NP_066569.1):p.(Leu285SerfsTer15)	GRCh38	indel	frameshift	heterozygous	McLeod neuroacanthocytosis syndrome	Cardiomegaly, senility, Huntington-like symptoms, MacLeod syndrome noted	DOI:10.1002/ana.10035	https://www.ncbi.nlm.nih.gov/books/NBK1354/

## Sheet: Table S3
Table S3 - ACMG P/LP variants identified
Chr	Posn	Ref	Alt	Assembly	Genomic_variant	cDNA_variant	Protein_variant	ACMG	Gene	VariantType	VariantEffect	InheritenceModel	GEL-Solved	Stage1-solved	Stage2-solved	VariantCount	ProbandCount	JOPD	EOPD	LOPD	AgeRange	Female	Male	FH+	FH-	consanguinity+	Recurrent?	Notes
chr21	25891796	C	T	GRCh38	NC_000021.9:g.25891796C>T	NC_000021.9(NM_000484.4):c.2137G>A	NC_000021.9(NP_000475.1):p.(Ala713Thr)	LP	APP	SNV	missense	monoallelic	0	0	1	1	1	0	0	1	Late	0	1	0	1	0
chr22	50626264	C	T	GRCh38	NC_000022.11:g.50626264C>T	NC_000022.11(NM_000487.6):c.869G>A	NC_000022.11(NP_000478.3):p.(Arg290His)	LP	ARSA	SNV	missense	monoallelic	0	1	0	1	1	0	0	1	Late	0	1	1	0	0
chr22	50626709	G	A	GRCh38	NC_000022.11:g.50626709G>A	NC_000022.11(NM_000487.6):c.736C>T	NC_000022.11(NP_000478.3):p.(Arg246Cys)	LP	ARSA	SNV	missense	monoallelic	0	1	0	1	1	0	0	1	Late	0	1	1	0	0
chr22	50626877	G	A	GRCh38	NC_000022.11:g.50626877G>A	NC_000022.11(NM_000487.6):c.641C>T	NC_000022.11(NP_000478.3):p.(Ala214Val)	LP	ARSA	SNV	missense	monoallelic	0	1	0	1	1	0	0	1	Late	1	0	1	0	0
chr22	50627338	G	A	GRCh38	NC_000022.11:g.50627338G>A	NC_000022.11(NM_000487.6):c.293C>T	NC_000022.11(NP_000478.3):p.(Ser98Phe)	LP	ARSA	SNV	missense	monoallelic	0	1	0	1	1	0	0	1	Late	0	1	0	1	0
chr11	108343254	TGAATGGTGCACAG	T	GRCh38	NC_000011.10:g.108343255_108343267del	NC_000011.10(NM_000051.4):c.8305_8317del	NC_000011.10(NP_000042.3):p.(Trp2769LeufsTer33)	LP	ATM	indel	frameshift	biallelic	0	0	1	1	1	0	1	0	Early	1	0	0	1	0
chr11	108343254	A	G	GRCh38	NC_000011.10:g.108289774A>G	NC_000011.10(NM_000051.4):c.4409A>G	NC_000011.10(NP_000042.3):p.(Tyr1470Cys)	LP	ATM	SNV	missense	biallelic	0	0	1	1	1	0	1	0	Early	1	0	0	1	0
chr14	92071010-92071051	CAGrepeat	expansion	GRCh38	NC_000014.9:g.92071010ins	NC_000014.9(NM_004993.6):c.913ins	NC_000014.9(NP_004984.2):p.(Gln304ins)	P	ATXN3	Repeat	repeatexpansion	monoallelic	1	0	0	1	1	0	1	0	Early	0	1	1	0	0
chr5	150080941	T	TGCCC	GRCh38	NC_000005.10:g.150080942_150080945dup	NC_000005.10(NM_001288705.3):c.129_132dup	NC_000005.10(NP_001275634.1):p.(Asn45GlyfsTer20)	P	CSF1R	indel	frameshift	monoallelic	0	1	0	1	1	0	0	1	Late	0	1	0	1	0
chr2	74605195	C	T	GRCh37	NC_000002.11:g.74605195C>T	NC_000002.11(NM_004082.5):c.211G>A	NC_000002.11(NP_004073.2):p.(Gly71Arg)	P	DCTN1	SNV	missense	monoallelic	1	0	0	1	1	0	0	1	Late	1	0	1	0	0
chr3	132477995	A	G	GRCh38	NC_000003.12:g.132477995A>G	NC_000003.12(NM_015268.4):c.2564A>G	NC_000003.12(NP_056083.3):p.(Asn855Ser)	LP	DNAJC13	SNV	missense	monoallelic	0	0	1	1	1	0	0	1	Late	1	0	0	1	0
chr14	101983252	A	G	GRCh38	NC_000014.9:g.101983252A>G	NC_000014.9(NM_001376.5):c.1195A>G	NC_000014.9(NP_001367.2):p.(Arg399Gly)	LP	DYNC1H1	SNV	missense	monoallelic	1	0	0	1	1	0	1	0	Early	0	1	0	0	0
chr1	155235843	T	C	GRCh38	NC_000001.11:g.155235843T>C	NC_000001.11(NM_000157.4):c.1226A>G	NC_000001.11(NP_000148.2):p.(Asn409Ser)	P	GBA1	SNV	missense	biallelic	0	2	0	2	1	0	1	0	Early	1	0	0	1	0
chr1	155236277	G	A	GRCh38	NC_000001.11:g.155236277G>A	NC_000001.11(NM_000157.4):c.1192C>T	NC_000001.11(NP_000148.2):p.(Arg398Ter)	P	GBA1	SNV	stop-gain	monoallelic	1	0	0	1	1	0	0	1	Late	1	0	1	0	0
chr1	155236376	C	T	GRCh38	NC_000001.11:g.155236376C>T	NC_000001.11(NM_000157.4):c.1093G>A	NC_000001.11(NP_000148.2):p.(Glu365Lys)	P	GBA1	SNV	missense	biallelic	1	0	0	1	1	0	1	0	Early	0	1	0	1	0
chr1	155238215	T	C	GRCh38	NC_000001.11:g.155238215T>C	NC_000001.11(NM_000157.4):c.680A>G	NC_000001.11(NP_000148.2):p.(Asn227Ser)	LP	GBA1	SNV	missense	monoallelic	1	0	0	1	1	0	0	1	Late	0	1	1	0	0
chr1	155238650	C	T	GRCh38	NC_000001.11:g.155238650C>T	NC_000001.11(NM_000157.4):c.455G>A	NC_000001.11(NP_000148.2):p.(Gly152Glu)	P	GBA1	SNV	missense	biallelic	1	0	0	1	1	0	1	0	Early	0	1	0	1	0
chr1	155240629	C	T	GRCh38	NC_000001.11:g.155240629C>T	NC_000001.11(NM_000157.4):c.115+1G>A		P	GBA1	SNV	splice	monoallelic	2	0	0	2	2	0	0	2	Late	2	0	1	0	0	Yes
chr11	17772124	G	A	GRCh38	NC_000011.10:g.17772124G>A	NC_000011.10(NM_001112741.2):c.1030G>A	NC_000011.10(NP_001106212.1):p.(Glu344Lys)	LP	KCNC1	SNV	missense	monoallelic	1	0	0	1	1	1	0	0	Juvenile	0	1	0	1	0
chr22	37057420	G	A	GRCh38	NC_000022.11:g.37057420G>A	NC_000022.11(NM_001282684.2):c.413G>A	NC_000022.11(NP_001269613.2):p.(Arg138His)	LP	KCTD17	SNV	missense	monoallelic	0	0	1	1	1	0	1	0	Early	0	1	0	1	0
chr12	57569534	G	A	GRCh38	NC_000012.12:g.57569534G>A	NC_000012.12(NM_004984.4):c.969-1G>A		LP	KIF5A	SNV	splice	monoallelic	1	0	0	1	1	0	0	1	Late	1	0	0	1	0
chr12	40310434	C	T	GRCh38	NC_000012.12:g.40310434C>T	NC_000012.12(NM_198578.4):c.4321C>T	NC_000012.12(NP_940980.4):p.(Arg1441Cys)	P	LRRK2	SNV	missense	monoallelic	1	0	0	1	1	0	0	1	Late	0	1	1	0	0
chr12	40340400	G	A	GRCh38	NC_000012.12:g.40340400G>A	NC_000012.12(NM_198578.4):c.6055G>A	NC_000012.12(NP_940980.4):p.(Gly2019Ser)	P	LRRK2	SNV	missense	monoallelic	5	8	0	13	13	0	4	9	Early & late	7	6	7	5	0	Yes	one GRCh37
chr17	44087754	C	T	GRCh37	NC_000017.10:g.44087754C>T	NC_000017.10(NM_001377265.1):c.2077C>T	NC_000017.10(NP_001364194.1):p.(Pro693Ser)	P	MAPT	SNV	missense	monoallelic	1	0	0	1	1	0	1	0	Early	0	1	0	1	0
NA	NA	CAGrepeat	expansion	GRCh38	expansion	expansion	expansion	NA	NA	Repeat	repeatexpansion	monoallelic	1	0	0	1	1	0	1	0	Early	1	0	0	0	0
chr19	15187213	G	A	GRCh38	NC_000019.10:g.15187213G>A	NC_000019.10(NM_000435.3):c.1732C>T	NC_000019.10(NP_000426.2):p.(Arg578Cys)	LP	NOTCH3	SNV	missense	monoallelic	0	0	1	1	1	0	1	0	Early	1	0	0	0	1
chr18	23536736	A	G	GRCh38	NC_000018.10:g.23536736A>G	NC_000018.10(NM_000271.5):c.3182T>C	NC_000018.10(NP_000262.2):p.(Ile1061Thr)	P	NPC1	SNV	missense	biallelic	0	0	1	1	1	0	1	0	Early	0	1	0	1	1
chr18	23545063	C	A	GRCh38	NC_000018.10:g.23545063C>A	NC_000018.10(NM_000271.5):c.1844G>T	NC_000018.10(NP_000262.2):p.(Arg615Leu)	P	NPC1	SNV	missense	biallelic	0	0	1	1	1	0	1	0	Early	0	1	0	1	1
chr3	193643527	G	A	GRCh38	NC_000003.12:g.193643527G>A	NC_000003.12(NM_130837.3):c.1378-1G>A		P	OPA1	SNV	splice	monoallelic	1	0	0	1	1	1	0	0	Juvenile	0	1	1	0	0
chr3	193667167	CAGTT	C	GRCh38	NC_000003.12:g.193667168_193667171del	NC_000003.12(NM_130837.3):c.2873-2_2874del		P	OPA1	indel	splice	monoallelic	1	0	0	1	1	1	0	0	Juvenile	0	1	0	0	0
chr1	8045014	GGCC	G	GRCh37	NC_000001.10:g.8045015_8045017del	NC_000001.10(NM_007262.5):c.471_473del	NC_000001.10(NP_009193.2):p.(Pro158del)	LP	PARK7	indel	inframe deletion	biallelic	2	0	0	2	1	1	0	0	Juvenile	0	1	0	1	1
chr1	20645640	T	C	GRCh38	NC_000001.11:g.20645640T>C	NC_000001.11(NM_032409.3):c.1040T>C	NC_000001.11(NP_115785.1):p.(Leu347Pro)	LP	PINK1	SNV	missense	biallelic	1	0	0	1	1	0	1	0	Early	1	0	0	0	0
chr1	20648994	G	A	GRCh38	NC_000001.11:g.20648994G>A	NC_000001.11(NM_032409.3):c.1252-1G>A		P	PINK1	SNV	splice	biallelic	1	0	0	1	1	0	1	0	Early	1	0	0	0	0
chr1	20648995	G	C	GRCh38	NC_000001.11:g.20648995G>C	NC_000001.11(NM_032409.3):c.1252G>C	NC_000001.11(NP_115785.1):p.(Val418Leu)	LP	PINK1	SNV	missense	biallelic	0	1	0	1	1	0	1	0	Early	1	0	0	0	0
chr1	20975702	T	C	GRCh37	NC_000001.10:g.20975702T>C	NC_000001.10(NM_032409.3):c.1466T>C	NC_000001.10(NP_115785.1):p.(Leu489Pro)	P	PINK1	SNV	missense	biallelic	2	0	0	2	1	0	1	0	Early	0	1	0	1	0
chr1	20645224-20646381		DEL	GRCh38	NC_000001.11:g.20645224_20646381del	NC_000001.11(NM_032409.3):c.960-336_1123+658del	NC_000001.11(NP_115785.1):p.(Asn320LysfsTer17)	LP	PINK1	SV	frameshift	biallelic	0	1	0	1	1	0	1	0	Early	1	0	0	0	0		PINK1 exon5 deletion
chr22	38112558	C	T	GRCh38	NC_000022.11:g.38112558C>T	NC_000022.11(NM_003560.4):c.2222G>A	NC_000022.11(NP_003551.2):p.(Arg741Gln)	P	PLA2G6	SNV	missense	biallelic	2	0	0	2	1	0	1	0	Early	1	0	0	0	1
chr22	38511644	T	C	GRCh37	NC_000022.10:g.38511644T>C	NC_000022.10(NM_003560.4):c.1924A>G	NC_000022.10(NP_003551.2):p.(Thr642Ala)	LP	PLA2G6	SNV	missense	biallelic	0	1	0	1	1	0	1	0	Early	1	0	0	1	0
chr22	38541632	C	T	GRCh37	NC_000022.10:g.38541632C>T	NC_000022.10(NM_003560.4):c.238G>A	NC_000022.10(NP_003551.2):p.(Ala80Thr)	LP	PLA2G6	SNV	missense	biallelic	0	1	0	1	1	0	1	0	Early	1	0	0	1	0
chr6	161350187	G	A	GRCh38	NC_000006.12:g.161350187G>A	NC_000006.12(NM_004562.3):c.1310C>T	NC_000006.12(NP_004553.2):p.(Pro437Leu)	LP	PRKN	SNV	missense	biallelic	1	0	0	1	1	1	0	0	Juvenile	0	1	0	1	0
chr6	161350208	C	T	GRCh38	NC_000006.12:g.161350208C>T	NC_000006.12(NM_004562.3):c.1289G>A	NC_000006.12(NP_004553.2):p.(Gly430Asp)	P	PRKN	SNV	missense	biallelic	1	0	0	1	1	1	0	0	Juvenile	0	1	0	1	0
chr6	161572727	G	C	GRCh38	NC_000006.12:g.161572727G>C	NC_000006.12(NM_004562.3):c.872-3311C>G	NC_000006.12(NP_004553.2):p.(=)	P	PRKN	SNV	splice	biallelic	0	1	0	1	1	0	1	0	Early	0	1	0	1	0
chr6	161785820	G	A	GRCh38	NC_000006.12:g.161785820G>A	NC_000006.12(NM_004562.3):c.823C>T	NC_000006.12(NP_004553.2):p.(Arg275Trp)	P	PRKN	SNV	missense	biallelic	3	5	0	8	7	1	5	1	Juvenile, early & late	1	6	2	2	0	Yes
chr6	161785839	A	T	GRCh38	NC_000006.12:g.161785839A>T	NC_000006.12(NM_004562.3):c.804T>A	NC_000006.12(NP_004553.2):p.(Cys268Ter)	P	PRKN	SNV	stop-gain	biallelic	1	0	0	1	1	0	1	0	Early	1	0	0	1	0
chr6	161973317	G	A	GRCh38	NC_000006.12:g.161973317G>A	NC_000006.12(NM_004562.3):c.719C>T	NC_000006.12(NP_004553.2):p.(Thr240Met)	LP	PRKN	SNV	missense	biallelic	1	0	0	1	1	1	0	0	Juvenile	0	1	0	1	0
chr6	162262560	TCAGTGTGTGCAGAATGACAGCCAGCCCCACAGAGTCTCCTGG	T	GRCh38	NC_000006.12:g.162262561_162262600del	NC_000006.12(NM_004562.3):c.337_376del	NC_000006.12(NP_004553.2):p.(Pro113ThrfsTer51)	P	PRKN	indel	frameshift	biallelic	2	0	0	2	2	1	1	0	Juvenile & early	1	1	0	1	0	Yes
chr6	162443325	AT	A	GRCh38	NC_000006.12:g.162443327del	NC_000006.12(NM_004562.3):c.155del	NC_000006.12(NP_004553.2):p.(Asn52MetfsTer29)	LP	PRKN	indel	frameshift	biallelic	0	1	0	1	1	0	1	0	Early	0	1	1	0	0
chr6	162443378	CCT	C	GRCh38	NC_000006.12:g.162443379_162443380del	NC_000006.12(NM_004562.3):c.101_102del	NC_000006.12(NP_004553.2):p.(Gln34ArgfsTer5)	P	PRKN	indel	frameshift	biallelic	5	1	0	6	4	1	3	0	Juvenile & early	2	2	2	2	0	Yes
chr6	161556155-161662030		DEL	GRCh38	NC_000006.12:g.161556155_161662030del	NC_000006.12(NM_004562.3):c.872-92613_934-7151del	NC_000006.12(NP_004553.2):p.(Ala291ValfsTer35)	LP	PRKN	SV	frameshift	biallelic	0	1	0	1	1	0	1	0	Early	0	1	0	1	0		PRKN exon 8 deletion
chr6	161812763-162167209		DEL	GRCh38	NC_000006.12:g.161812764_162167210del	NC_000006.12(NM_004562.3):c.534+33922_735-26855del	NC_000006.12(NP_004553.2):p.(Gly179GlufsTer29)	LP	PRKN	SV	frameshift	biallelic	0	1	0	1	1	0	1	0	Early	0	1	1	0	0		PRKN exon 5-6 deletion
chr6	162073218-162247168		DEL	GRCh38	NC_000006.12:g.162073218_162247168del	NC_000006.12(NM_004562.3):c.412+15357_535-19044del	NC_000006.12(NP_004553.2):p.(Ala138GlyfsTer7)	LP	PRKN	SV	frameshift	biallelic	0	1	0	1	1	1	0	0	Juvenile	0	1	1	0	0		PRKN exon 4 deletion
chr6	162131417-162380362		DEL	GRCh38	NC_000006.12:g.162131417_162380362del	NC_000006.12(NM_004562.3):c.171+62948_534+69714del	NC_000006.12(NP_004553.2):p.(Asn58_Gln178del)	LP	PRKN	SV	inframe deletion	biallelic	0	1	0	1	1	0	1	0	Early	0	1	0	1	0	recurrent protein change (underlying DNA change differs)	PRKN exon 3-4 deletion
chr6	162193900-162325144		DEL	GRCh38	NC_000006.12:g.162193900_162325144del	NC_000006.12(NM_004562.3):c.172-62379_534+7231del	NC_000006.12(NP_004553.2):p.(Asn58_Gln178del)	LP	PRKN	SV	deletion	biallelic	0	1	0	1	1	0	0	1	Late	0	1	0	0	0	recurrent protein change (underlying DNA change differs)	PRKN exon 3-4 deletion
chr6	162230539-162284521		DEL	GRCh38	NC_000006.12:g.162230539_162284521del	NC_000006.12(NM_004562.3):c.172-21756_413-29287del	NC_000006.12(NP_004553.2):p.(Asn58GlnfsTer39)	LP	PRKN	SV	frameshift	biallelic	0	2	0	2	1	0	1	0	Early	1	0	0	1	1	recurrent protein change (underlying DNA change differs)	PRKN exon 3 deletion
chr6	162258305-162361676		DEL	GRCh38	NC_000006.12:g.162258305_162361676del	NC_000006.12(NM_004562.3):c.171+81634_412+4220del	NC_000006.12(NP_004553.2):p.(Asn58GlnfsTer39)	P	PRKN	SV	frameshift	biallelic	0	1	0	1	1	0	1	0	Early	0	1	0	1	0	recurrent protein change (underlying DNA change differs)	PRKN exon 3 deletion
chr6	162258501-162373306		DEL	GRCh38	NC_000006.12:g.162258501_162373306del	NC_000006.12(NM_004562.3):c.171+70004_412+4024del	NC_000006.12(NP_004553.2):p.(Asn58GlnfsTer39)	P	PRKN	SV	frameshift	biallelic	0	1	0	1	1	0	1	0	Early	0	1	0	1	0	recurrent protein change (underlying DNA change differs)	PRKN exon 3 deletion
chr6	162456048-162777519		DEL	GRCh38	NC_000006.12:g.162456049_162777520del	NC_000006.12(NM_004562.3):c.-49851_8-12575del	NC_000006.12(NP_004553.2):p.?	P	PRKN	SV	start-loss	biallelic	0	1	0	1	1	0	1	0	Early	0	1	0	0	0		PRKN exon 1, PACRG exon 1 deletion
chr6	162610351-162875135		DEL	GRCh37	NC_000006.11:g.162610351_162875135del	NC_000006.11(NM_004562.3):c.8-10630_534+11812del	NC_000006.11(NP_004553.2):p.(Val3GlyfsTer7)	P	PRKN	SV	frameshift	biallelic	2	0	0	2	1	0	1	0	Early	0	1	1	0	1		PRKN exon 2-4 deletion
chr14	73173621	T	G	GRCh38	NC_000014.9:g.73173621T>G	NC_000014.9(NM_000021.4):c.394T>G	NC_000014.9(NP_000012.1):p.(Ser132Ala)	LP	PSEN1	SNV	missense	monoallelic	1	0	0	1	1	0	0	1	Late	0	1	0	1	0
chr4	89731017	C	G	GRCh38	NC_000004.12:g.89731017C>G	NC_000004.12(NM_000345.4):c.307-1740G>C	NC_000004.12(NP_000336.1):p.(=)	LP	SNCA	SNV	splice	monoallelic	0	1	0	1	1	0	0	1	Late	0	1	0	1	0
chr4	89828154	C	T	GRCh38	NC_000004.12:g.89828154C>T	NC_000004.12(NM_000345.4):c.152G>A	NC_000004.12(NP_000336.1):p.(Gly51Asp)	P	SNCA	SNV	missense	monoallelic	1	0	0	1	1	0	1	0	Early	1	0	1	0	0
chr4	89570721-90822766		DEL	GRCh38	NC_000004.12:g.89570721_90822766del	NC_000004.12(NM_001145065.2):c.-557152_2094+6921del		LP	SNCA	SV	deletion	monoallelic	0	1	0	1	1	0	1	0	Early	0	1	1	0	1		SNCA, MMRN1 whole gene, CCSER1 exon 1-8 deletion
chr11	121590147	G	T	GRCh38	NC_000011.10:g.121590147G>T	NC_000011.10(NM_003105.6):c.4186G>T	NC_000011.10(NP_003096.2):p.(Asp1396Tyr)	LP	SORL1	SNV	missense	monoallelic	0	0	1	1	1	0	1	0	Early	1	0	0	1	0
chr2	32063861	G	C	GRCh38	NC_000002.12:g.32063861G>C	NC_000002.12(NM_014946.4):c.30G>C	NC_000002.12(NP_055761.2):p.(Lys10Asn)	LP	SPAST	SNV	missense	monoallelic	0	0	1	1	1	0	0	1	Late	0	1	0	1	1
chr2	32141906	G	A	GRCh38	NC_000002.12:g.32141906G>A	NC_000002.12(NM_014946.4):c.1496G>A	NC_000002.12(NP_055761.2):p.(Arg499His)	P	SPAST	SNV	missense	monoallelic	1	0	0	1	1	1	0	0	Juvenile	1	0	0	0	0
chr15	44596282	G	C	GRCh38	NC_000015.10:g.44596282G>C	NC_000015.10(NM_025137.4):c.4235C>G	NC_000015.10(NP_079413.3):p.(Ser1412Ter)	LP	SPG11	SNV	stop-gain	biallelic	0	1	0	1	1	1	0	0	Juvenile	0	1	1	0	0
chr15	44569209-44578773		DEL	GRCh38	NC_000015.10:g.44569209_44578773del	NC_000015.10(NM_025137.4):c.5867-3732_6585+189del	NC_000015.10(NP_079413.3):p.(Thr1956LysfsTer21)	LP	SPG11	SV	frameshift	biallelic	0	1	0	1	1	1	0	0	Juvenile	0	1	1	0	0		SPG11 exons 41-45 deletion
chr16	89526347	C	T	GRCh38	NC_000016.10:g.89526347C>T	NC_000016.10(NM_003119.4):c.637C>T	NC_000016.10(NP_003110.1):p.(Arg213Ter)	LP	SPG7	SNV	stop-gain	biallelic	0	0	1	1	1	0	1	0	Early	0	1	0	0	0
chr16	89529575	C	CT	GRCh38	NC_000016.10:g.89529579dup	NC_000016.10(NM_003119.4):c.861dup	NC_000016.10(NP_003110.1):p.(Asn288Ter)	P	SPG7	indel	stop-gain	biallelic	1	0	0	1	1	0	1	0	Early	0	1	0	0	0
chr16	89529580	C	G	GRCh38	NC_000016.10:g.89529580G>C	NC_000016.10(NM_003119.4):c.861+1G>C		LP	SPG7	SNV	splice	biallelic	0	0	1	1	1	0	0	1	Late	0	1	0	1	0
chr16	89546656	AGGAGAGGCG	A	GRCh38	NC_000016.10:g.89546657_89546665del	NC_000016.10(NM_003119.4):c.1450-1_1457del		P	SPG7	indel	splice	biallelic	1	0	1	2	2	0	1	1	Late	1	1	0	2	0	Yes
chr16	89546737	C	T	GRCh38	NC_000016.10:g.89546737C>T	NC_000016.10(NM_003119.4):c.1529C>T	NC_000016.10(NP_003110.1):p.(Ala510Val)	P	SPG7	SNV	missense	biallelic	2	0	1	3	3	0	1	2	Late	1	2	0	2	0	Yes
chr5	179833095	CAG	C	GRCh38	NC_000005.10:g.179833096_179833097del	NC_000005.10(NM_003900.5):c.823_824del	NC_000005.10(NP_003891.1):p.(Ser275PhefsTer17)	LP	SQSTM1	indel	frameshift	monoallelic	0	0	1	1	1	0	1	0	Early	0	1	0	1	0
chr5	179836543	G	A	GRCh38	NC_000005.10:g.179836543G>A	NC_000005.10(NM_003900.5):c.1273G>A	NC_000005.10(NP_003891.1):p.(Gly425Arg)	LP	SQSTM1	SNV	missense	monoallelic	0	0	1	1	1	0	0	1	Late	1	0	0	1	0
chr21	32695106	C	T	GRCh38	NC_000021.9:g.32695106C>T	NC_000021.9(NM_203446.3):c.656G>A	NC_000021.9(NP_982271.3):p.(Arg219Gln)	P	SYNJ1	SNV	missense	biallelic	2	0	0	2	1	0	1	0	Early	0	1	0	0	0
chr9	129818752	A	T	GRCh38	NC_000009.12:g.129818752A>T	NC_000009.12(NM_000113.3):c.613T>A	NC_000009.12(NP_000104.1):p.(Phe205Ile)	LP	TOR1A	SNV	missense	monoallelic	0	0	1	1	1	0	0	1	Late	0	1	0	0	0
chr3	48508968	A	G	GrCh37	NC_000003.11:g.48508968A>G	NC_000003.11(NM_033629.6):c.914A>G	NC_000003.11(NP_338599.1):p.(Tyr305Cys)	LP	TREX1	SNV	missense	monoallelic	0	0	1	1	1	0	1	0	Early	0	1	0	1	1
chr9	35065352	G	A	GRCh38	NC_000009.12:g.35065352G>A	NC_000009.12(NM_007126.5):c.475C>T	NC_000009.12(NP_009057.1):p.(Arg159Cys)	P	VCP	SNV	missense	monoallelic	1	0	0	1	1	0	0	1	Late	0	1	1	0	0
chr9	77256177	T	C	GRCh38	NC_000009.12:g.77256177T>C	NC_000009.12(NM_033305.3):c.2288+3825T>C	NC_000009.12(NP_150648.2):p.(=)	LP	VPS13A	SNV	splice	biallelic	0	1	0	1	1	0	1	0	Early	0	1	0	1	1
chr9	77368098	G	A	GRCh38	NC_000009.12:g.77368098G>A	NC_000009.12(NM_033305.3):c.8515G>A	NC_000009.12(NP_150648.2):p.(Asp2839Asn)	LP	VPS13A	SNV	missense	biallelic	0	1	0	1	1	0	1	0	Early	0	1	0	1	1
chr15	61881582	T	C	GRCh38	NC_000015.10:g.61881582T>C	NC_000015.10(NM_020821.3):c.9757A>G	NC_000015.10(NP_065872.1):p.(Ser3253Gly)	LP	VPS13C	SNV	missense	biallelic	0	0	1	1	1	0	0	1	Late	0	1	0	1	0
chr15	61951016	C	G	GRCh38	NC_000015.10:g.61951016C>G	NC_000015.10(NM_020821.3):c.4465G>C	NC_000015.10(NP_065872.1):p.(Gly1489Arg)	LP	VPS13C	SNV	missense	biallelic	0	0	1	1	1	0	1	0	Early	0	1	0	1	0
chr15	61962393	T	C	GRCh38	NC_000015.10:g.61962393T>C	NC_000015.10(NM_020821.3):c.3581A>G	NC_000015.10(NP_065872.1):p.(His1194Arg)	LP	VPS13C	SNV	missense	biallelic	0	0	1	1	1	0	0	1	Late	0	1	0	1	0
chr15	61982562	A	C	GRCh38	NC_000015.10:g.61982562A>C	NC_000015.10(NM_020821.3):c.1926T>G	NC_000015.10(NP_065872.1):p.(Asn642Lys)	LP	VPS13C	SNV	missense	biallelic	0	0	1	1	1	0	1	0	Early	0	1	0	1	0
chrX	37727980	TTATC	T	GRCh38	NC_000023.11:g.37727981_37727984del	NC_000023.11(NM_021083.4):c.854_857del	NC_000023.11(NP_066569.1):p.(Leu285SerfsTer15)	P	XK	indel	frameshift	monoallelic	0	0	1	1	1	0	0	1	Late	0	1	0	1	0

## Sheet: Table S4
Table S4 - VUS variants
StudyStage	Recruitment	Onset	Sex	FamilyHistory?	Consanguinity?	FamilyType	Inheritance	Gene	GenomicVariant	cDNAvariant	ProteinVariant	Assembly	VariantType	VariantEffect	ObservedStatus	VariantRecurrence	DifferentialDiagnosis	SupportingPhenotypes	GeneReview	Notes
Stage 2	Early onset and familial Parkinson's disease	EOPD	Male	No	No	Singleton		ATP2B3	NC_000023.10:g.152801898A>C	NC_000023.10(NM_001001344.3):c.193A>C	NC_000023.10(NP_001001344.1):p.(Thr65Pro)	GRCh37	SNV	missense	heterozygous		Spinocerebellar ataxia	Gait ataxia, postural instability		Phenotype fits but no distinguishing symptoms between PD and ATP2B3 ataxia. Variant not in calmodulin binding domain (as described in other cases)
Stage 2	Complex Parkinsonism (includes pallido-pyramidal syndromes)	LOPD	Male	No	No	Singleton		CACNA1A	NC_000019.10:g.13303642C>A	NC_000019.10(NM_001127222.2):c.2105-29G>T	NC_000019.10(NP_001120694.1):p.(=)	GRCh38	SNV	splice	heterozygous		Episodic ataxia	No migraines, sensory loss or hemiparesis noted	https://www.ncbi.nlm.nih.gov/books/NBK1388/	Phenotype does not fit with expected. Splice variant - would need functional data to support
Stage 2	Early onset and familial Parkinson's disease	EOPD	Female	No	No	Singleton		CACNA1A	NC_000019.10:g.13428418G>A	NC_000019.10(NM_001127222.2):c.539+24458C>T	NC_000019.10(NP_001120694.1):p.(=)	GRCh38	SNV	splice	heterozygous		Episodic ataxia	No migraines, sensory loss or hemiparesis noted	https://www.ncbi.nlm.nih.gov/books/NBK1388/	Phenotype does not fit with expected. Splice variant - would need functional data to support
Stage 2	Early onset and familial Parkinson's disease	EOPD	Male	No	No	Singleton		MATR3	NC_000005.9:g.138651653_138661282del	NC_000005.9(NM_018834.6):c.1017-112_2302del		GRCh37	SV	frameshift	heterozygous		Amyotrophic lateral sclerosis	No muscle weakness, bulbar signs, dysarthria or dysphagia noted	https://www.ncbi.nlm.nih.gov/books/NBK1450/	Phenotype does not fit. No effect seen in transcriptome (although the effect is expected to be dosage sensitive)
Stage 2	Early onset and familial Parkinson's disease	EOPD	Female	No	No	Singleton		OPTN	NC_000010.11:g.13110342C>T	NC_000010.11(NM_001008212.2):c.235C>T	NC_000010.11(NP_001008213.1):p.(Gln79Ter)	GRCh38	SNV	stop-gain	heterozygous		Amyotrophic lateral sclerosis	No muscle weakness, bulbar signs, dysarthria or dysphagia noted	https://www.ncbi.nlm.nih.gov/books/NBK1450/	Phenotype does not fit. Variant is stop-gain but is seen in general population
Stage 2	Early onset and familial Parkinson's disease	LOPD	Female	No	No	Singleton		SOD1	NC_000021.9:g.31668487A>T	NC_000021.9(NM_000454.5):c.374A>T	NC_000021.9(NP_000445.1):p.(Asp125Val)	GRCh38	SNV	missense	heterozygous		Amyotrophic lateral sclerosis	No muscle weakness, bulbar signs, dysarthria or dysphagia noted	https://www.ncbi.nlm.nih.gov/books/NBK1450/	Variant has been described as pathogenic in one family but phenotype does not fit here
Stage 2	Early onset and familial Parkinson's disease	EOPD	Female	No	Yes	Singleton		SQSTM1	NC_000005.10:g.179836445C>T	NC_000005.10(NM_003900.5):c.1175C>T	NC_000005.10(NP_003891.1):p.(Pro392Leu)	GRCh38	SNV	missense	heterozygous	3 cases	Frontotemporal dementia and/or amyotrophic lateral sclerosis	Spasticity, limb ataxia, cognitive difficulties, dysarthria, dysphagia, osteophyte	https://www.ncbi.nlm.nih.gov/books/NBK1450/	Variant has been widely described as pathogenic (or high-risk) but common in general population with three homozygotes in gnomAD
Stage 2	Early onset and familial Parkinson's disease	LOPD	Male	No	Yes	Singleton		SQSTM1	NC_000005.10:g.179836445C>T	NC_000005.10(NM_003900.5):c.1175C>T	NC_000005.10(NP_003891.1):p.(Pro392Leu)	GRCh38	SNV	missense	heterozygous	3 cases	Frontotemporal dementia and/or amyotrophic lateral sclerosis	Spasticity, cognitive disturbance, dementia, dysphagia	https://www.ncbi.nlm.nih.gov/books/NBK1450/	Variant has been widely described as pathogenic (or high-risk) but common in general population with three homozygotes in gnomAD
Stage 2	Early onset and familial Parkinson's disease	EOPD	Female	No	Yes	Duo (Proband and affected Mother)	Inherited from affected Mother	SQSTM1	NC_000005.10:g.179836445C>T	NC_000005.10(NM_003900.5):c.1175C>T	NC_000005.10(NP_003891.1):p.(Pro392Leu)	GRCh38	SNV	missense	heterozygous	3 cases	Frontotemporal dementia and/or amyotrophic lateral sclerosis	Spasticity, dysarthria, osteophyte	https://www.ncbi.nlm.nih.gov/books/NBK1450/	Variant has been widely described as pathogenic (or high-risk) but common in general population with three homozygotes in gnomAD
ad hoc	Early onset and familial Parkinson's disease	EOPD	Female	No	No	Singleton		GBA1	NC_000001.11:g.155237453C>T	NC_000001.11(NM_000157.4):c.887G>A	NC_000001.11(NP_000148.2):p.(Arg296Gln)	GRCh38	SNV	missense	heterozygous	3 cases				Severe PD risk (https://pdgenetics.shinyapps.io/gba1browser/)
ad hoc	Early onset and familial Parkinson's disease	EOPD	Female	No	No	Singleton		GBA1	NC_000001.11:g.155235727C>G	NC_000001.11(NM_000157.4):c.1342G>C	NC_000001.11(NP_000148.2):p.(Asp448His)	GRCh38	SNV	missense	heterozygous	3 cases				Severe(null)
ad hoc	Early onset and familial Parkinson's disease	EOPD	Female	No	No	Duo (Proband and unaffected Mother)	Not inherited from unaffected Mother	GBA1	NC_000001.11:g.155235727C>G	NC_000001.11(NM_000157.4):c.1342G>C	NC_000001.11(NP_000148.2):p.(Asp448His)	GRCh38	SNV	missense	heterozygous	17 cases				Severe PD risk (https://pdgenetics.shinyapps.io/gba1browser/)
ad hoc	Early onset and familial Parkinson's disease	EOPD	Female	Yes	No	Singleton		GBA1	NC_000001.11:g.155235823C>T	NC_000001.11(NM_000157.4):c.1246G>A	NC_000001.11(NP_000148.2):p.(Gly416Ser)	GRCh38	SNV	missense	heterozygous					Severe PD risk (https://pdgenetics.shinyapps.io/gba1browser/)
ad hoc	Early onset and familial Parkinson's disease	EOPD	Female	Yes	No	Singleton		GBA1	NC_000001.11:g.155235252A>G	NC_000001.11(NM_000157.4):c.1448T>C	NC_000001.11(NP_000148.2):p.(Leu483Pro)	GRCh38	SNV	missense	heterozygous	17 cases				Severe PD risk (https://pdgenetics.shinyapps.io/gba1browser/)
ad hoc	Early onset and familial Parkinson's disease	EOPD	Female	No	No	Singleton		GBA1	NC_000001.11:g.155235252A>G	NC_000001.11(NM_000157.4):c.1448T>C	NC_000001.11(NP_000148.2):p.(Leu483Pro)	GRCh38	SNV	missense	heterozygous	17 cases				Severe PD risk (https://pdgenetics.shinyapps.io/gba1browser/)
ad hoc	Early onset and familial Parkinson's disease	EOPD	Female	No	NA	Singleton		GBA1	NC_000001.11:g.155235252A>G	NC_000001.11(NM_000157.4):c.1448T>C	NC_000001.11(NP_000148.2):p.(Leu483Pro)	GRCh38	SNV	missense	heterozygous	17 cases				Severe PD risk (https://pdgenetics.shinyapps.io/gba1browser/)
ad hoc	Early onset and familial Parkinson's disease	EOPD	Female	No	NA	Singleton		GBA1	NC_000001.11:g.155239657del	NC_000001.11(NM_000157.4):c.413del	NC_000001.11(NP_000148.2):p.(Pro138LeufsTer62)	GRCh38	indel	frameshift	heterozygous					Severe PD risk (https://pdgenetics.shinyapps.io/gba1browser/)
ad hoc	Early onset and familial Parkinson's disease	EOPD	Female	Yes	No	Singleton		GBA1	NC_000001.11:g.155235774C>T	NC_000001.11(NM_000157.4):c.1295G>A	NC_000001.11(NP_000148.2):p.(Trp432Ter)	GRCh38	SNV	stop-gain	heterozygous					Severe PD risk (https://pdgenetics.shinyapps.io/gba1browser/)
ad hoc	Early onset and familial Parkinson's disease	EOPD	Male	No	No	Duo (Proband and unaffected Mother)	Not inherited from unaffected Mother	GBA1	NC_000001.10:g.155208421G>A	NC_000001.10(NM_000157.4):c.475C>T	NC_000001.10(NP_000148.2):p.(Arg159Trp)	GRCh37	SNV	missense	heterozygous	3 cases				Severe PD risk (https://pdgenetics.shinyapps.io/gba1browser/)
ad hoc	Early onset and familial Parkinson's disease	EOPD	Male	Yes	No	Singleton		GBA1	NC_000001.11:g.155238629C>T	NC_000001.11(NM_000157.4):c.476G>A	NC_000001.11(NP_000148.2):p.(Arg159Gln)	GRCh38	SNV	missense	heterozygous					Severe PD risk (https://pdgenetics.shinyapps.io/gba1browser/)
ad hoc	Early onset and familial Parkinson's disease	EOPD	Male	No	No	Trio (Proband & unaffected Parents)	Inherited from unaffected Father	GBA1	NC_000001.11:g.155238630G>A	NC_000001.11(NM_000157.4):c.475C>T	NC_000001.11(NP_000148.2):p.(Arg159Trp)	GRCh38	SNV	missense	heterozygous	3 cases				Severe PD risk (https://pdgenetics.shinyapps.io/gba1browser/)
ad hoc	Early onset and familial Parkinson's disease	EOPD	Male	No	No	Singleton		GBA1	NC_000001.11:g.155237453C>T	NC_000001.11(NM_000157.4):c.887G>A	NC_000001.11(NP_000148.2):p.(Arg296Gln)	GRCh38	SNV	missense	heterozygous	3 cases				Severe PD risk (https://pdgenetics.shinyapps.io/gba1browser/)
ad hoc	Early onset and familial Parkinson's disease	EOPD	Male	No	No	Singleton		GBA1	NC_000001.11:g.155235252A>G	NC_000001.11(NM_000157.4):c.1448T>C	NC_000001.11(NP_000148.2):p.(Leu483Pro)	GRCh38	SNV	missense	heterozygous	17 cases				Severe PD risk (https://pdgenetics.shinyapps.io/gba1browser/). Also carries SQSTM1 variant p.(Ser275PhefsTer17)
ad hoc	Early onset and familial Parkinson's disease	EOPD	Male	No	Yes	Singleton		GBA1	NC_000001.11:g.155235252A>G	NC_000001.11(NM_000157.4):c.1448T>C	NC_000001.11(NP_000148.2):p.(Leu483Pro)	GRCh38	SNV	missense	heterozygous	17 cases				Severe PD risk (https://pdgenetics.shinyapps.io/gba1browser/)
ad hoc	Early onset and familial Parkinson's disease	EOPD	Male	NA	No	Duo (Proband and unaffected sib)	Not shared by unaffected sib	GBA1	NC_000001.11:g.155235252A>G	NC_000001.11(NM_000157.4):c.1448T>C	NC_000001.11(NP_000148.2):p.(Leu483Pro)	GRCh38	SNV	missense	heterozygous	17 cases				Severe PD risk (https://pdgenetics.shinyapps.io/gba1browser/)
ad hoc	Early onset and familial Parkinson's disease	EOPD	Male	No	No	Singleton		GBA1	NC_000001.11:g.155235252A>G	NC_000001.11(NM_000157.4):c.1448T>C	NC_000001.11(NP_000148.2):p.(Leu483Pro)	GRCh38	SNV	missense	heterozygous	17 cases				Severe PD risk (https://pdgenetics.shinyapps.io/gba1browser/)
ad hoc	Early onset and familial Parkinson's disease	EOPD	Male	No	Yes	Duo (Proband and unaffected Mother)	Inherited from unaffected Mother	GBA1	NC_000001.11:g.155235252A>G	NC_000001.11(NM_000157.4):c.1448T>C	NC_000001.11(NP_000148.2):p.(Leu483Pro)	GRCh38	SNV	missense	heterozygous	17 cases				Severe PD risk (https://pdgenetics.shinyapps.io/gba1browser/)
ad hoc	Early onset and familial Parkinson's disease	JOPD	Male	No	No	Singleton		GBA1	NC_000001.11:g.155235252A>G	NC_000001.11(NM_000157.4):c.1448T>C	NC_000001.11(NP_000148.2):p.(Leu483Pro)	GRCh38	SNV	missense	heterozygous	17 cases				Severe PD risk (https://pdgenetics.shinyapps.io/gba1browser/)
ad hoc	Early onset and familial Parkinson's disease	LOPD	Female	Yes	No	Singleton		GBA1	NC_000001.11:g.155235727C>G	NC_000001.11(NM_000157.4):c.1342G>C	NC_000001.11(NP_000148.2):p.(Asp448His)	GRCh38	SNV	missense	heterozygous	17 cases				Severe(null)
ad hoc	Early onset and familial Parkinson's disease	LOPD	Female	NA	NA	Singleton		GBA1	NC_000001.11:g.155235252A>G	NC_000001.11(NM_000157.4):c.1448T>C	NC_000001.11(NP_000148.2):p.(Leu483Pro)	GRCh38	SNV	missense	heterozygous	17 cases				Severe PD risk (https://pdgenetics.shinyapps.io/gba1browser/)
ad hoc	Early onset and familial Parkinson's disease	LOPD	Female	Yes	No	Singleton		GBA1	NC_000001.11:g.155235252A>G	NC_000001.11(NM_000157.4):c.1448T>C	NC_000001.11(NP_000148.2):p.(Leu483Pro)	GRCh38	SNV	missense	heterozygous	17 cases				Severe PD risk (https://pdgenetics.shinyapps.io/gba1browser/)
ad hoc	Early onset and familial Parkinson's disease	LOPD	Male	Yes	No	Singleton		GBA1	NC_000001.11:g.155238630G>A	NC_000001.11(NM_000157.4):c.475C>T	NC_000001.11(NP_000148.2):p.(Arg159Trp)	GRCh38	SNV	missense	heterozygous	3 cases				Severe PD risk (https://pdgenetics.shinyapps.io/gba1browser/)
ad hoc	Early onset and familial Parkinson's disease	LOPD	Male	Yes	No	Singleton		GBA1	NC_000001.11:g.155237453C>T	NC_000001.11(NM_000157.4):c.887G>A	NC_000001.11(NP_000148.2):p.(Arg296Gln)	GRCh38	SNV	missense	heterozygous	3 cases				Severe PD risk (https://pdgenetics.shinyapps.io/gba1browser/). Also carries SQSTM1 variant p.(Pro392Leu)
ad hoc	Complex Parkinsonism (includes pallido-pyramidal syndromes)	LOPD	Male	Yes	No	Singleton		GBA1	NC_000001.11:g.155235252A>C	NC_000001.11(NM_000157.4):c.1448T>G	NC_000001.11(NP_000148.2):p.(Leu483Arg)	GRCh38	SNV	missense	heterozygous					Severe PD risk (https://pdgenetics.shinyapps.io/gba1browser/)
ad hoc	Early onset and familial Parkinson's disease	LOPD	Male	Yes	No	Singleton		GBA1	NC_000001.11:g.155235252A>G	NC_000001.11(NM_000157.4):c.1448T>C	NC_000001.11(NP_000148.2):p.(Leu483Pro)	GRCh38	SNV	missense	heterozygous	17 cases				Severe PD risk (https://pdgenetics.shinyapps.io/gba1browser/)
ad hoc	Complex Parkinsonism (includes pallido-pyramidal syndromes)	LOPD	Male	No	No	Singleton		GBA1	NC_000001.11:g.155235252A>G	NC_000001.11(NM_000157.4):c.1448T>C	NC_000001.11(NP_000148.2):p.(Leu483Pro)	GRCh38	SNV	missense	heterozygous	17 cases				Severe PD risk (https://pdgenetics.shinyapps.io/gba1browser/)
ad hoc	Early onset and familial Parkinson's disease	LOPD	Male	Yes	No	Singleton		GBA1	NC_000001.11:g.155235252A>G	NC_000001.11(NM_000157.4):c.1448T>C	NC_000001.11(NP_000148.2):p.(Leu483Pro)	GRCh38	SNV	missense	heterozygous	17 cases				Severe PD risk (https://pdgenetics.shinyapps.io/gba1browser/). Also carries ARSA variant p.(Arg246Cys)
