# Supplementary material
Source: Research Square preprint supplement (doi:10.21203/rs.3.rs-9290362/v1)
Supplement: Supplementary file 1 [file aa093de9cfb939b331068350.docx]

**A systematic genomic screen of 755 early-onset Parkinson’s patients from the 100,000 Genomes Project increases diagnostic yield and directs clinical pathways**

Dianne F Newbury, Nidhuna Sabu, El Siddig Hag Hussein, Jenny C Taylor

**SUPPLEMENTARY METHODS**

**Small Variant Filtering**

Within each gene screening stage, single nucleotide variants (coding and non-coding) and short indels were filtered in accordance with ACMG guidelines 1 as detailed below:

Firstly, any variant that met ACMG criteria for benign/likely benign 1 was excluded. This included:

1. Any variant with expected population frequency (max_AF) >5%
2. Any variant with expected population frequency (max_AF) at or below disease incidence (0.1%) for which multiple lines of computational evidence suggested no effect upon gene function (spliceAI<0.2 AND CADD<20 AND phyloP<2.27)
3. Any synonymous, intergenic or intronic variant with expected population frequency (max_AF) at or below disease incidence (0.1%) and spliceAI<0.2

Remaining variants were then annotated according to the ACMG criteria for pathogenic variants 1. This system assesses characteristics that are typical of pathogenic variants as described below.

- **PVS1** – To identify null variants in a gene where loss-of-function (LoF) is a known mechanism of disease, all variants in a gene with pLI>0.9 AND LOEUF<0.6 were flagged.
- **PS1** – To identify variants previously established as pathogenic or likely pathogenic, any variant classified a pathogenic or likely pathogenic (but not benign) in ClinVar was flagged.
- **PS2** – To identify *de novo* variants, all variants in probands who had available genetic data for both parents were manually visualised in IGV. Any variant that was not seen in either parent was flagged.
- **PS4** – To identify variants with an increased frequency in cases compared to controls, variants with an expected population frequency (max_AF) <0.1% that were observed in three or more Parkinson’s probands (case frequency of 0.2%) were flagged
- **PM1** – To identify variants located in a critical functional domain without benign variation, variants that had an entry in the ‘domain’ VEP annotation column were cross-referenced with the ‘Family & Domains’ feature of Uniprot. Any variant that altered a known functional domain was flagged.
- **PM2** – To identify variants that were absent from population controls, or at an extremely low frequency if recessive, variants that fell in known haploinsufficient genes (pLI>0.9 AND LOEUF<0.6) were flagged if they had an expected population frequency (max_AF) ≤1x10-5 , variants that fell within genes expected to have a bialleleic mechanism (pREC>0.9) were flagged if they had an expected population frequency (max_AF) ≤1x10-3. Remaining variants were only flagged if they were novel (max_AF=0) and fell in a gene with pNULL<0.9.
- **PM3** – To identify variants that were expected to have a biallelic inheritance and was detected in trans with a second variant, variants in genes with pREC>0.9 were flagged if two variants were observed in the same proband.
- **PM4** – To identify variants that altered the protein length as a result of an inframe deletion/insertion, all variants annotated as an inframe insertion/deletion were manually checked in IGV to ensure they did not occur in a repeat region and then flagged.
- **PM5** – To identify novel missense variants at positions where a different missense variant has previously been annotated as pathogenic, all novel variants (max_AF=0) were cross referenced with ClinVar, gnomAD and LOVD. Any variant at a position with a pathogenic annotation was flagged.
- **PP1** – To identify variants that cosegregated with disease in a gene known to cause Parkinson’s, all variants in probands who had available genetic data for both parents and multiple family members were manually visualised in IGV. Any variant that cosegregated with disease status was flagged.
- **PP2** – To identify missense variants in genes with a low rate of benign missense variants, all missense variants that fell in a gene with a low rate of missense variation (missense o/e <0.4) were flagged.
- **PP3** – To identify variants supported by multiple lines of computational evidence, six algorithms were considered. Any variant with three or more algorithms supporting a deleterious effect (spliceAI≥0.2, CADD≥20, phyloP≥2.27, α-missense≥0.6, REVEL≥0.5, SIFT≤0.05) were flagged.
- **PP4** – As all selected probands presented with early-onset Parkinson’s Disease all variants were flagged as being specific to a disease with a single genetic aetiology.

**Structural Variant filtering**

Structural variants were also prioritised according to ACMG guidelines 2. This system uses a score-based prioritisation where points are given on the basis of the assessments described below.

- **ACMG-1: Assessment of genomic content** – Variants that contained or overlapped with a gene of interest were flagged. Variants that were entirely intronic or did not affect a gene of interest were excluded.
- **ACMG-2: Assessment of gene content** – Variants that completely overlapped with a known haploinsufficient gene (pLI>0.9 and LOEUF<0.6) were prioritised (scored at 1.0) over those that partially overlap the coding sequence (scored at 0.9) or the last exon (scored at 0.3). Variants completely contained in an established benign CNV region (as indicated by presence in >75 GEL probands included in the SVRare analysis (N=71408, frequency of 1x10-3) or in a homozygous state in >10 GEL probands included in the SVRare analysis (N=71408, frequency of 1.5x10-4) were excluded.
- **ACMG-3: Assessment of gene number** - Variants that affected 25 or more genes were flagged. Variants that affected 35+ genes were prioritised (scored at 0.9) over those that contained 25-34 genes (scored at 0.45).
- **ACMG-4: Assessment of supporting literature** – Variants that did not fall within haploinsufficient genes were flagged if previous literature described an individual with a similar phenotype and a similar structural variant. De novo variants from the literature were prioritised (scored at 0.3) over those within unknown inheritance (scored at 0.1) or inherited variants (scored at 0.15 to 0.45 depending on the number of segregations).
- **ACMG-5: Assessment of inheritance in carrier proband** – *De novo* and co-segregating variants were prioritised (scored at 0.45) over those within unknown inheritance (scored at 0).

**Assessment of Pathogenicity**

Following the filtering described above, any small variants with at least one piece of moderate (PM) evidence and 2 supporting pieces of evidence (PP) and any structural variant with a score of 1.0 were manually assessed for quality and inheritance patterns (where available).

**SUPPLEMENTARY REFERENCES**

1. Richards, S. *et al.* Standards and guidelines for the interpretation of sequence variants: a joint consensus recommendation of the American College of Medical Genetics and Genomics and the Association for Molecular Pathology. *Genetics in Medicine* **17**, 405–424 (2015).

2. Riggs, E. R. *et al.* Technical standards for the interpretation and reporting of constitutional copy-number variants: a joint consensus recommendation of the American College of Medical Genetics and Genomics (ACMG) and the Clinical Genome Resource (ClinGen). *Genetics in Medicine* **22**, 245–257 (2020).

3. Parlar, S. C., Grenn, F. P., Kim, J. J., Baluwendraat, C. & Gan-Or, Z. Classification of GBA1 Variants in Parkinson’s Disease: The GBA1-PD Browser. *Mov Disord* **38**, 489–495 (2023).

4. Robinson, J. T. *et al.* Integrative genomics viewer. *Nat Biotechnol* **29**, 24–26 (2011).
